# Supplementary material for: Host-Parasite Interactions and Population Dynamics of Rock Ptarmigan
Source: PLoS One. 2016 Nov 21;11(11):e0165293. doi: 10.1371/journal.pone.0165293 (PMC5117593; doi:10.1371/journal.pone.0165293)
Supplement: S1 File — (CSV) [file pone.0165293.s001.csv]

id	sex	age	year	bm	bs	bci	dens	densmin1	densmin2	densa	densj	mort	juvex	brood	emi	eri	cci	tti	tli	shi	mii	mbi	mli	gli	lai	ali	oci	parrich	endr	ectr	totr	emp	erp	ccp	ttp	tlp	shp	mip	mbp	mlp	glp	lap	alp	ocp	cocp	help	licp	mitp	endp
LM-06-005	m	a	2006	493	1.36	-24.13	6.11	8.12	4.28	2.66		1.29	0.87	6.53	5	2	0	4	0	0	0	0	0	1	0	0	0	4	1360.5	201.5	1562	1	1	0	1	0	0	0	0	0	1	0	0	0	1	1	1	0	1
LM-06-008	m	a	2006	474	-0.74	-8.53	6.11	8.12	4.28	2.66		1.29	0.87	6.53	22	0	0	4	1	0	0	0	1	0	0	0	0	4	915.5	716	1631.5	1	0	0	1	1	0	0	0	1	0	0	0	0	1	1	0	1	1
LM-06-019	f	a	2006	441	-1.64	-26.87	6.11	8.12	4.28	2.66		1.29	0.87	6.53	6	0	5	0	18	0	4	0	0	13	0	0	0	5	743.5	1558.5	2302	1	0	1	0	1	0	1	0	0	1	0	0	0	1	1	1	1	1
LM-06-027	m	a	2006	553	3.33	3.6	6.11	8.12	4.28	2.66		1.29	0.87	6.53	534	0	0	8	5	1	0	1	0	0	0	0	0	5	1212.5	1230	2442.5	1	0	0	1	1	1	0	1	0	0	0	0	0	1	1	0	1	1
LM-06-031	m	a	2006	546	2.06	17.46	6.11	8.12	4.28	2.66		1.29	0.87	6.53	20	0	0	0	0	0	0	0	0	0	0	0	0	1	284.5	0	284.5	1	0	0	0	0	0	0	0	0	0	0	0	0	1	0	0	0	1
LM-06-032	f	a	2006	464	-0.01	-30.65	6.11	8.12	4.28	2.66		1.29	0.87	6.53	22	0	0	2	6	0	0	0	0	0	0	0	0	3	910	299.5	1209.5	1	0	0	1	1	0	0	0	0	0	0	0	0	1	1	0	1	1
LM-06-033	m	a	2006	520	2.61	-17.61	6.11	8.12	4.28	2.66		1.29	0.87	6.53	2	0	0	0	2	0	0	0	0	0	0	0	0	2	154.5	158.5	313	1	0	0	0	1	0	0	0	0	0	0	0	0	1	0	0	1	1
LM-06-038	f	a	2006	476	-2.01	14.29	6.11	8.12	4.28	2.66		1.29	0.87	6.53	88	28	0	0	1	0	0	0	0	0	2	0	4	5	1008	1162.5	2170.5	1	1	0	0	1	0	0	0	0	0	1	0	1	1	0	1	1	1
LM-06-055	m	a	2006	499	0.82	-9.18	6.11	8.12	4.28	2.66		1.29	0.87	6.53	126	0	0	0	1	2	0	0	0	3	0	0	0	4	462	849.5	1311.5	1	0	0	0	1	1	0	0	0	1	0	0	0	1	0	1	1	1
LM-06-067	f	a	2006	501	0.03	5.79	6.11	8.12	4.28	2.66		1.29	0.87	6.53	10	0	0	2	7	77	0	1	0	5	2	0	0	7	853	2302	3155	1	0	0	1	1	1	0	1	0	1	1	0	0	1	1	1	1	1
LM-06-070	f	a	2006	458	-0.94	-21.35	6.11	8.12	4.28	2.66		1.29	0.87	6.53	84	0	4	0	15	0	0	0	0	7	0	0	3	5	956.5	1476.5	2433	1	0	1	0	1	0	0	0	0	1	0	0	1	1	1	1	1	1
LM-06-080	f	a	2006	495	-0.21	3.67	6.11	8.12	4.28	2.66		1.29	0.87	6.53	44	0	74	0	6	0	0	0	1	3	4	4	0	7	981	2321	3302	1	0	1	0	1	0	0	0	1	1	1	1	0	1	1	1	1	1
LM-06-089	f	a	2006	526	1.33	9.4	6.11	8.12	4.28	2.66		1.29	0.87	6.53	2	2	0	0	4	0	1	0	0	0	0	0	0	4	703	745.5	1448.5	1	1	0	0	1	0	1	0	0	0	0	0	0	1	0	0	1	1
LM-06-097	m	a	2006	552	2.11	22.57	6.11	8.12	4.28	2.66		1.29	0.87	6.53	108	0	0	0	1	1	0	0	0	0	0	0	2	4	449.5	1059.5	1509	1	0	0	0	1	1	0	0	0	0	0	0	1	1	0	0	1	1
LM-06-098	f	a	2006	511	1.17	-2.97	6.11	8.12	4.28	2.66		1.29	0.87	6.53	88	0	0	2	86	0	6	0	0	0	0	0	0	4	1042	1183	2225	1	0	0	1	1	0	1	0	0	0	0	0	0	1	1	0	1	1
LM-06-101	f	a	2006	492	-0.27	1.6	6.11	8.12	4.28	2.66		1.29	0.87	6.53	0	0	22	0	10	62	0	0	0	0	1	0	2	5	592.5	1886.5	2479	0	0	1	0	1	1	0	0	0	0	1	0	1	0	1	1	1	1
LM-06-109	m	a	2006	512	0.64	6.7	6.11	8.12	4.28	2.66		1.29	0.87	6.53	142	0	1	2	32	56	0	0	0	0	0	0	0	5	1558.5	1138	2696.5	1	0	0	1	1	1	0	0	0	0	0	0	0	1	1	0	1	1
LM-06-110	m	a	2006	518	1.42	-0.01	6.11	8.12	4.28	2.66		1.29	0.87	6.53	0	0	0	0	5	0	0	0	0	0	0	0	0	1	0	272.5	272.5	0	0	0	0	1	0	0	0	0	0	0	0	0	0	0	0	1	0
LM-06-111	m	a	2006	525	1.79	0.89	6.11	8.12	4.28	2.66		1.29	0.87	6.53	132	0	1	0	4	0	0	0	1	3	0	0	0	5	933	1148.5	2081.5	1	0	0	0	1	0	0	0	1	1	0	0	0	1	0	1	1	1
LM-06-131	m	a	2006	479	1.63	-42.45	6.11	8.12	4.28	2.66		1.29	0.87	6.53	0	0	0	0	7	0	0	1	1	0	2	0	0	4	0	1933.5	1933.5	0	0	0	0	1	0	0	1	1	0	1	0	0	0	0	1	1	0
LM-06-135	m	a	2006	540	2.38	6.2	6.11	8.12	4.28	2.66		1.29	0.87	6.53	8	2	1	0	2	0	0	0	0	0	0	0	0	4	1236.5	158.5	1395	1	1	0	0	1	0	0	0	0	0	0	0	0	1	0	0	1	1
LM-06-136	m	a	2006	498	2.5	-37.75	6.11	8.12	4.28	2.66		1.29	0.87	6.53	78	0	0	0	1	0	0	0	0	1	0	0	0	3	411.5	310	721.5	1	0	0	0	1	0	0	0	0	1	0	0	0	1	0	1	1	1
LM-06-142	f	a	2006	471	-0.1	-22.17	6.11	8.12	4.28	2.66		1.29	0.87	6.53	9520	0	0	0	5	29	0	0	0	2	0	0	0	4	630	1084.5	1714.5	1	0	0	0	1	1	0	0	0	1	0	0	0	1	0	1	1	1
LM-06-158	m	a	2006	627	4.06	65.64	6.11	8.12	4.28	2.66		1.29	0.87	6.53	0	0	0	0	5	0	0	0	0	0	0	0	2	2	0	824	824	0	0	0	0	1	0	0	0	0	0	0	0	1	0	0	0	1	0
LM-06-159	m	a	2006	491	1.63	-30.56	6.11	8.12	4.28	2.66		1.29	0.87	6.53	0	0	2	0	10	0	0	0	1	4	0	0	4	5	502.5	1947	2449.5	0	0	1	0	1	0	0	0	1	1	0	0	1	0	1	1	1	1
LM-06-180	m	a	2006	503	3.23	-44.66	6.11	8.12	4.28	2.66		1.29	0.87	6.53	164	0	0	4	0	0	0	0	1	0	0	0	1	4	1117.5	1062.5	2180	1	0	0	1	0	0	0	0	1	0	0	0	1	1	1	0	1	1
LM-06-182	m	a	2006	518	1.02	6.45	6.11	8.12	4.28	2.66		1.29	0.87	6.53	24	0	4	0	7	261	0	0	1	0	0	0	0	5	836	1559.5	2395.5	1	0	1	0	1	1	0	0	1	0	0	0	0	1	1	0	1	1
LM-06-184	f	a	2006	547	2.3	14.6	6.11	8.12	4.28	2.66		1.29	0.87	6.53	2	0	0	0	15	4	0	0	0	3	0	0	0	4	154.5	1218	1372.5	1	0	0	0	1	1	0	0	0	1	0	0	0	1	0	1	1	1
LM-06-190	m	a	2006	519	3.31	-30.01	6.11	8.12	4.28	2.66		1.29	0.87	6.53	22	0	0	0	0	0	0	0	0	3	3	0	1	4	295	1242.5	1537.5	1	0	0	0	0	0	0	0	0	1	1	0	1	1	0	1	0	1
LM-06-195	f	a	2006	468	-0.88	-12.3	6.11	8.12	4.28	2.66		1.29	0.87	6.53	3082	784	0	8	0	0	0	0	0	0	0	0	0	3	1876.5	0	1876.5	1	1	0	1	0	0	0	0	0	0	0	0	0	1	1	0	0	1
LM-06-199	f	a	2006	430	-2.52	-23.45	6.11	8.12	4.28	2.66		1.29	0.87	6.53	270	0	1	2	87	0	0	0	0	2	0	0	0	5	1619.5	874.5	2494	1	0	0	1	1	0	0	0	0	1	0	0	0	1	1	1	1	1
LM-07-012	f	a	2007	453	-0.66	-30.98	4.03	8.12	4.28	1.73		0.77	0.61	7.64	0	0	0	0	15	2	0	0	0	0	0	0	0	2	0	885	885	0	0	0	0	1	1	0	0	0	0	0	0	0	0	0	0	1	0
LM-07-013	m	a	2007	515.44	1.91	-10.68	4.03	8.12	4.28	1.73		0.77	0.61	7.64	37	1	0	0	12	0	0	0	0	0	0	0	0	3	877.5	414	1291.5	1	1	0	0	1	0	0	0	0	0	0	0	0	1	0	0	1	1
LM-07-015	m	a	2007	495	-1.3	21.64	4.03	8.12	4.28	1.73		0.77	0.61	7.64	9	24	2	0	3	0	0	0	0	0	0	0	0	4	1313.5	200	1513.5	1	1	1	0	1	0	0	0	0	0	0	0	0	1	1	0	1	1
LM-07-016	m	a	2007	522.8	1.47	3.94	4.03	8.12	4.28	1.73		0.77	0.61	7.64	1	0	2	0	7	0	0	0	0	3	0	0	0	4	644	629	1273	1	0	1	0	1	0	0	0	0	1	0	0	0	1	1	1	1	1
LM-07-025	f	a	2007	477.47	-1.68	10.24	4.03	8.12	4.28	1.73		0.77	0.61	7.64	495	0	0	0	27	0	0	0	0	4	1	0	0	4	583	1238.5	1821.5	1	0	0	0	1	0	0	0	0	1	1	0	0	1	0	1	1	1
LM-07-033	m	a	2007	531	0.24	32.39	4.03	8.12	4.28	1.73		0.77	0.61	7.64	3	0	2	0	3	0	0	0	0	0	0	0	0	3	672.5	200	872.5	1	0	1	0	1	0	0	0	0	0	0	0	0	1	1	0	1	1
LM-07-035	m	a	2007	509	0.88	-0.17	4.03	8.12	4.28	1.73		0.77	0.61	7.64	1020	0	0	0	2	1	1	0	0	0	0	0	0	4	611.5	1064.5	1676	1	0	0	0	1	1	1	0	0	0	0	0	0	1	0	0	1	1
LM-07-036	m	a	2007	553	0.96	42.54	4.03	8.12	4.28	1.73		0.77	0.61	7.64	0	0	0	0	0	0	0	0	1	0	0	0	0	1	0	607.5	607.5	0	0	0	0	0	0	0	0	1	0	0	0	0	0	0	0	1	0
LM-07-041	f	a	2007	472.48	-2.39	16.89	4.03	8.12	4.28	1.73		0.77	0.61	7.64	0	0	0	0	61	3	0	0	1	7	1	0	0	5	0	2474.5	2474.5	0	0	0	0	1	1	0	0	1	1	1	0	0	0	0	1	1	0
LM-07-042	f	a	2007	462.37	-1.13	-13.83	4.03	8.12	4.28	1.73		0.77	0.61	7.64	106	0	0	0	20	2	0	0	0	1	1	0	1	6	447.5	1949.5	2397	1	0	0	0	1	1	0	0	0	1	1	0	1	1	0	1	1	1
LM-07-050	f	a	2007	486	-1.11	9.51	4.03	8.12	4.28	1.73		0.77	0.61	7.64	53	0	0	0	12	0	13	2	2	1	1	0	0	7	374	2785	3159	1	0	0	0	1	0	1	1	1	1	1	0	0	1	0	1	1	1
LM-07-060	m	a	2007	516.38	1.83	-8.4	4.03	8.12	4.28	1.73		0.77	0.61	7.64	739	0	2	0	3	0	0	0	0	0	0	0	0	3	1100.5	200	1300.5	1	0	1	0	1	0	0	0	0	0	0	0	0	1	1	0	1	1
LM-07-062	m	a	2007	525	1.19	10.65	4.03	8.12	4.28	1.73		0.77	0.61	7.64	0	0	0	0	1	0	1	0	0	3	0	0	0	3	0	917	917	0	0	0	0	1	0	1	0	0	1	0	0	0	0	0	1	1	0
LM-07-070	m	a	2007	488.22	-0.67	4.53	4.03	8.12	4.28	1.73		0.77	0.61	7.64	0	0	1	0	5	0	0	0	0	0	0	0	1	3	466.5	727.5	1194	0	0	1	0	1	0	0	0	0	0	0	0	1	0	1	0	1	1
LM-07-089	m	a	2007	495	0.2	-2.99	4.03	8.12	4.28	1.73		0.77	0.61	7.64	31	0	0	0	6	1	0	0	0	0	0	0	1	4	321	1154	1475	1	0	0	0	1	1	0	0	0	0	0	0	1	1	0	0	1	1
LM-07-103	m	a	2007	545.77	0.97	35.16	4.03	8.12	4.28	1.73		0.77	0.61	7.64	19	795	0	0	89	131	0	0	0	0	2	0	0	5	903	1677.5	2580.5	1	1	0	0	1	1	0	0	0	0	1	0	0	1	0	1	1	1
LM-07-115	m	a	2007	532	3.28	-16.49	4.03	8.12	4.28	1.73		0.77	0.61	7.64	0	0	0	0	15	0	0	0	0	0	3	0	0	2	0	931.5	931.5	0	0	0	0	1	0	0	0	0	0	1	0	0	0	0	1	1	0
LM-07-119	m	a	2007	560	2.01	32.3	4.03	8.12	4.28	1.73		0.77	0.61	7.64	543	0	26	0	8	0	2	0	0	0	0	0	0	4	1183.5	884.5	2068	1	0	1	0	1	0	1	0	0	0	0	0	0	1	1	0	1	1
LM-07-125	m	a	2007	522	1.25	6.75	4.03	8.12	4.28	1.73		0.77	0.61	7.64	23	1	1	0	5	0	0	0	0	1	0	0	0	5	1306	474	1780	1	1	1	0	1	0	0	0	0	1	0	0	0	1	1	1	1	1
LM-07-146	m	a	2007	510.16	0.59	5.75	4.03	8.12	4.28	1.73		0.77	0.61	7.64	7	0	0	0	2	0	12	2	2	0	0	0	1	6	211.5	2417	2628.5	1	0	0	0	1	0	1	1	1	0	0	0	1	1	0	0	1	1
LM-08-009	m	a	2008	585	1.78	61.08	5.58	8.12	4.28	1.82		0.47	1.11	7.38	0	0	0	0	0	0	0	0	2	0	0	0	0	1	0	628	628	0	0	0	0	0	0	0	0	1	0	0	0	0	0	0	0	1	0
LM-08-014	f	a	2008	525	-0.86	44.28	5.58	8.12	4.28	1.82		0.47	1.11	7.38	752	0	9	0	1	2	0	0	0	9	0	0	0	7	1163	1028.5	2191.5	1	0	1	0	1	1	0	0	0	1	0	0	0	1	1	1	1	1
LM-08-019	m	a	2008	550	1.96	23.03	5.58	8.12	4.28	1.82		0.47	1.11	7.38	0	0	0	0	0	0	0	0	0	0	0	0	0	0	0	0	0	0	0	0	0	0	0	0	0	0	0	0	0	0	0	0	0	0	0
LM-08-020	m	a	2008	476	-0.18	-15.72	5.58	8.12	4.28	1.82		0.47	1.11	7.38	0	0	0	0	0	0	0	0	1	0	1	0	0	2	0	970.5	970.5	0	0	0	0	0	0	0	0	1	0	1	0	0	0	0	1	1	0
LM-08-023	m	a	2008	551	1.46	32.32	5.58	8.12	4.28	1.82		0.47	1.11	7.38	50	0	0	0	0	0	0	0	0	0	0	0	0	1	368.5	0	368.5	1	0	0	0	0	0	0	0	0	0	0	0	0	1	0	0	1	1
LM-08-035	f	a	2008	487	-3.5	49.71	5.58	8.12	4.28	1.82		0.47	1.11	7.38	62	0	0	0	4	0	0	0	1	3	1	0	0	5	386.5	1511.5	1898	1	0	0	0	1	0	0	0	1	1	1	0	0	1	0	1	1	1
LM-08-041	m	a	2008	523	-0.14	30.59	5.58	8.12	4.28	1.82		0.47	1.11	7.38	104	0	10	0	9	0	0	0	0	0	0	0	3	4	1013.5	954	1967.5	1	0	1	0	1	0	0	0	0	0	0	0	1	1	1	0	1	1
LM-08-049	f	a	2008	506	-1.17	30.47	5.58	8.12	4.28	1.82		0.47	1.11	7.38	0	0	0	0	22	3	8	0	0	2	1	0	0	5	0	2156.5	2156.5	0	0	0	0	1	1	1	0	0	1	1	0	0	0	0	1	1	0
LM-08-055	m	a	2008	523	-0.03	28.7	5.58	8.12	4.28	1.82		0.47	1.11	7.38	0	0	0	0	1	0	0	0	0	0	0	0	0	1	0	108.5	108.5	0	0	0	0	1	0	0	0	0	0	0	0	0	0	0	0	1	0
LM-08-058	m	a	2008	560	2.4	25.89	5.58	8.12	4.28	1.82		0.47	1.11	7.38	572	0	0	0	0	0	0	0	0	0	1	0	0	2	589	363	952	1	0	0	0	0	0	0	0	0	0	1	0	0	1	0	1	0	1
LM-08-062	f	a	2008	459	-2.74	9.15	5.58	8.12	4.28	1.82		0.47	1.11	7.38	0	86	8	0	5	5	0	0	0	16	0	0	0	5	1155	1305	2460	0	1	1	0	1	1	0	0	0	1	0	0	0	1	1	1	1	1
LM-08-065	f	a	2008	512	-0.31	22.42	5.58	8.12	4.28	1.82		0.47	1.11	7.38	0	0	0	0	4	3	0	0	0	0	0	0	0	2	0	697.5	697.5	0	0	0	0	1	1	0	0	0	0	0	0	0	0	0	0	1	0
LM-08-071	m	a	2008	513	0.89	3.63	5.58	8.12	4.28	1.82		0.47	1.11	7.38	216	0	13	0	9	0	0	0	0	0	0	0	0	3	1095	362	1457	1	0	1	0	1	0	0	0	0	0	0	0	0	1	1	0	1	1
LM-08-072	f	a	2008	515	-0.84	33.97	5.58	8.12	4.28	1.82		0.47	1.11	7.38	84	0	1	0	19	1	1	0	0	3	0	0	0	6	889.5	1690	2579.5	1	0	1	0	1	1	1	0	0	1	0	0	0	1	1	1	1	1
LM-08-074	m	a	2008	542	0.79	34.31	5.58	8.12	4.28	1.82		0.47	1.11	7.38	16	0	0	0	1	1	0	0	0	0	0	0	0	3	267	508	775	1	0	0	0	1	1	0	0	0	0	0	0	0	1	0	0	1	1
LM-08-078	f	a	2008	477	-0.95	-2.15	5.58	8.12	4.28	1.82		0.47	1.11	7.38	112	0	0	0	11	0	0	0	0	0	0	0	1	3	453	855	1308	1	0	0	0	1	0	0	0	0	0	0	0	1	1	0	0	1	1
LM-08-085	m	a	2008	523	0.91	13.39	5.58	8.12	4.28	1.82		0.47	1.11	7.38	60	0	4	0	1	0	0	0	0	0	0	0	0	3	916.5	108.5	1025	1	0	1	0	1	0	0	0	0	0	0	0	0	1	1	0	1	1
LM-08-086	f	a	2008	521	-2	59.1	5.58	8.12	4.28	1.82		0.47	1.11	7.38	300	0	0	0	4	4	0	0	0	4	2	0	0	5	548	1495	2043	1	0	0	0	1	1	0	0	0	1	1	0	0	1	0	1	1	1
LM-08-096	f	a	2008	500	-0.69	16.57	5.58	8.12	4.28	1.82		0.47	1.11	7.38	0	0	0	0	1	0	0	0	0	2	0	0	2	3	0	916.5	916.5	0	0	0	0	1	0	0	0	0	1	0	0	1	0	0	1	1	0
LM-08-100	f	a	2008	469	-0.6	-15.85	5.58	8.12	4.28	1.82		0.47	1.11	7.38	0	0	0	0	52	1	0	0	0	2	0	0	0	3	0	1252.5	1252.5	0	0	0	0	1	1	0	0	0	1	0	0	0	0	0	1	1	0
LM-08-111	f	a	2008	492	-1.02	14	5.58	8.12	4.28	1.82		0.47	1.11	7.38	8	0	13	0	0	0	0	0	0	0	0	0	1	3	797	455	1252	1	0	1	0	0	0	0	0	0	0	0	0	1	1	1	0	1	1
LM-08-113	m	a	2008	550	0.3	50.25	5.58	8.12	4.28	1.82		0.47	1.11	7.38	12	0	1	0	0	0	0	0	2	0	0	0	0	3	716	628	1344	1	0	1	0	0	0	0	0	1	0	0	0	0	1	1	0	1	1
LM-08-115	f	a	2008	497	-1.24	22.66	5.58	8.12	4.28	1.82		0.47	1.11	7.38	0	0	0	0	47	2	4	2	0	2	19	0	0	6	0	3046	3046	0	0	0	0	1	1	1	1	0	1	1	0	0	0	0	1	1	0
LM-08-116	f	a	2008	509	-0.75	26.52	5.58	8.12	4.28	1.82		0.47	1.11	7.38	10	0	0	0	8	0	1	0	0	0	0	0	7	4	238	1481.5	1719.5	1	0	0	0	1	0	1	0	0	0	0	0	1	1	0	0	1	1
LM-08-138	m	a	2008	510	1.39	-7.58	5.58	8.12	4.28	1.82		0.47	1.11	7.38	2	0	5	0	2	0	1	0	0	9	0	0	0	5	696	1146	1842	1	0	1	0	1	0	1	0	0	1	0	0	0	1	1	1	1	1
LM-09-022	m	a	2009	514.2	-0.2	22.66	7.35	8.12	4.28	3.32		1.08	0.44	6.64	332	186	1	0	2	0	0	0	0	0	4	0	0	5	1634.5	678.5	2313	1	1	1	0	1	0	0	0	0	0	1	0	0	1	1	1	1	1
LM-09-026	m	a	2009	581.84	2.82	40.89	7.35	8.12	4.28	3.32		1.08	0.44	6.64	16	812	0	0	0	0	0	0	0	0	1	0	1	4	891	818	1709	1	1	0	0	0	0	0	0	0	0	1	0	1	1	0	1	1	1
LM-09-032	f	a	2009	486.23	-2.36	30.12	7.35	8.12	4.28	3.32		1.08	0.44	6.64	2	0	0	0	3	0	0	0	1	3	1	0	0	5	154.5	1472.5	1627	1	0	0	0	1	0	0	0	1	1	1	0	0	1	0	1	1	1
LM-09-036	m	a	2009	509.35	-0.58	24.05	7.35	8.12	4.28	3.32		1.08	0.44	6.64	22	0	0	0	2	0	0	0	0	6	0	0	0	3	295	565.5	860.5	1	0	0	0	1	0	0	0	0	1	0	0	0	1	0	1	1	1
LM-09-039	m	a	2009	539.8	0.57	35.77	7.35	8.12	4.28	3.32		1.08	0.44	6.64	0	0	0	0	4	0	0	0	0	0	0	0	1	2	0	694	694	0	0	0	0	1	0	0	0	0	0	0	0	1	0	0	0	1	0
LM-09-044	f	a	2009	516.82	-0.09	23.53	7.35	8.12	4.28	3.32		1.08	0.44	6.64	0	0	97	0	31	24	0	0	0	2	0	0	1	5	624.5	1804	2428.5	0	0	1	0	1	1	0	0	0	1	0	0	1	0	1	1	1	1
LM-09-056	m	a	2009	552.38	1.02	40.87	7.35	8.12	4.28	3.32		1.08	0.44	6.64	12	0	0	0	10	1	1	0	0	0	0	0	0	4	249.5	1287.5	1537	1	0	0	0	1	1	1	0	0	0	0	0	0	1	0	0	1	1
LM-09-069	m	a	2009	532.19	1.7	9.51	7.35	8.12	4.28	3.32		1.08	0.44	6.64	0	0	0	0	2	0	0	0	0	1	0	0	0	2	0	360	360	0	0	0	0	1	0	0	0	0	1	0	0	0	0	0	1	1	0
LM-09-077	m	a	2009	538.43	1.26	23	7.35	8.12	4.28	3.32		1.08	0.44	6.64	242	0	11	0	11	0	0	0	0	0	0	0	0	3	1099.5	400	1499.5	1	0	1	0	1	0	0	0	0	0	0	0	0	1	1	0	1	1
LM-09-078	m	a	2009	536.9	0.13	39.94	7.35	8.12	4.28	3.32		1.08	0.44	6.64	16	0	77	0	6	1	0	1	0	0	0	0	3	6	889	1849	2738	1	0	1	0	1	1	0	1	0	0	0	0	1	1	1	0	1	1
LM-09-081	f	a	2009	512.23	-0.88	31.85	7.35	8.12	4.28	3.32		1.08	0.44	6.64	0	0	0	0	25	0	0	0	0	8	0	0	0	2	0	988.5	988.5	0	0	0	0	1	0	0	0	0	1	0	0	0	0	0	1	1	0
LM-09-088	m	a	2009	518.71	-1.04	41.03	7.35	8.12	4.28	3.32		1.08	0.44	6.64	8	0	0	0	4	0	0	0	0	0	0	0	4	3	221.5	852	1073.5	1	0	0	0	1	0	0	0	0	0	0	0	1	1	0	0	1	1
LM-09-103	m	a	2009	510.35	-1.07	33.12	7.35	8.12	4.28	3.32		1.08	0.44	6.64	364	0	26	0	2	5	0	0	0	3	0	0	0	5	1165.5	938	2103.5	1	0	1	0	1	1	0	0	0	1	0	0	0	1	1	1	1	1
LM-09-105	f	a	2009	490.48	-4.09	62.88	7.35	8.12	4.28	3.32		1.08	0.44	6.64	130	0	1	0	4	0	0	0	0	9	0	0	0	4	931	720	1651	1	0	1	0	1	0	0	0	0	1	0	0	0	1	1	1	1	1
LM-09-108	m	a	2009	516.77	1.02	5.22	7.35	8.12	4.28	3.32		1.08	0.44	6.64	0	0	1	0	4	0	0	0	0	0	1	0	0	3	466.5	602	1068.5	0	0	1	0	1	0	0	0	0	0	1	0	0	0	1	1	1	1
LM-09-109	f	a	2009	510.35	-1.33	37.46	7.35	6.11	8.12	3.32		1.08	0.44	6.64	140	0	0	0	132	3	0	0	1	1	1	3	2	8	473.5	3396.5	3870	1	0	0	0	1	1	0	0	1	1	1	1	1	1	0	1	1	1
LM-09-127	m	a	2009	573.72	2.43	39.1	7.35	6.11	8.12	3.32		1.08	0.44	6.64	0	0	0	0	1	0	1	0	0	0	0	0	0	2	0	615	615	0	0	0	0	1	0	1	0	0	0	0	0	0	0	0	0	1	0
LM-09-165	f	a	2009	551.18	-0.18	59.36	7.35	6.11	8.12	3.32		1.08	0.44	6.64	6	0	0	0	4	34	0	0	0	1	0	0	0	4	202	1007	1209	1	0	0	0	1	1	0	0	0	1	0	0	0	1	0	1	1	1
LM-10-013	f	a	2010	523.5	0.82	15.3	7.93	6.11	8.12	2.53		1.4	1	6.46	88	0	0	0	4	0	0	0	0	3	0	0	0	3	427	541	968	1	0	0	0	1	0	0	0	0	1	0	0	0	1	0	1	1	1
LM-10-032	f	a	2010	503.3	-0.84	22.29	7.93	6.11	8.12	2.53		1.4	1	6.46	3	0	0	14	38	0	0	0	0	0	0	0	0	3	799	566.5	1365.5	1	0	0	1	1	0	0	0	0	0	0	0	0	1	1	0	1	1
LM-10-040	f	a	2010	517.23	-1.43	45.86	7.93	6.11	8.12	2.53		1.4	1	6.46	306	49	0	0	18	0	0	0	0	0	3	0	0	4	1139.5	958	2097.5	1	1	0	0	1	0	0	0	0	0	1	0	0	1	0	1	1	1
LM-10-045	m	a	2010	583.56	4.81	9.97	7.93	6.11	8.12	2.53		1.4	1	6.46	0	0	0	0	3	36	0	0	0	1	0	0	0	3	0	970.5	970.5	0	0	0	0	1	1	0	0	0	1	0	0	0	0	0	1	1	0
LM-10-051	m	a	2010	540.02	2.07	11.24	7.93	6.11	8.12	2.53		1.4	1	6.46	6	0	1	0	0	0	0	0	0	0	0	0	0	2	668.5	0	668.5	1	0	1	0	0	0	0	0	0	0	0	0	0	1	1	0	1	1
LM-10-061	f	a	2010	469.42	-2.51	15.91	7.93	6.11	8.12	2.53		1.4	1	6.46	73	0	0	0	2	0	1	0	0	0	0	0	0	3	403.5	665	1068.5	1	0	0	0	1	0	1	0	0	0	0	0	0	1	0	0	1	1
LM-10-066	m	a	2010	551.19	3.01	7.04	7.93	6.11	8.12	2.53		1.4	1	6.46	10	0	0	0	0	0	0	0	0	0	0	0	0	1	238	0	238	1	0	0	0	0	0	0	0	0	0	0	0	0	1	0	0	1	1
LM-10-069	m	a	2010	520.13	1.17	6.27	7.93	6.11	8.12	2.53		1.4	1	6.46	114	0	0	0	0	0	0	0	0	0	0	0	1	2	455	455	910	1	0	0	0	0	0	0	0	0	0	0	0	1	1	0	0	1	1
LM-10-078	f	a	2010	461.72	-2.19	2.92	7.93	6.11	8.12	2.53		1.4	1	6.46	27	0	32	0	15	0	0	0	1	2	1	0	0	6	911.5	1673	2584.5	1	0	1	0	1	0	0	0	1	1	1	0	0	1	1	1	1	1
LM-10-085	f	a	2010	475.2	-1.64	7.29	7.93	6.11	8.12	2.53		1.4	1	6.46	11	0	1	0	0	0	0	0	0	6	1	0	0	4	710.5	770	1480.5	1	0	1	0	0	0	0	0	0	1	1	0	0	1	1	1	1	1
LM-10-099	f	a	2010	508.52	0.81	0.48	7.93	6.11	8.12	2.53		1.4	1	6.46	0	0	0	0	0	0	0	0	0	12	1	0	0	2	0	883	883	0	0	0	0	0	0	0	0	0	1	1	0	0	0	0	1	1	0
LM-10-119	m	a	2010	522.24	0.98	11.36	7.93	6.11	8.12	2.53		1.4	1	6.46	149	0	1	0	3	0	0	0	0	0	1	0	1	5	951	1018	1969	1	0	1	0	1	0	0	0	0	0	1	0	1	1	1	1	1	1
LM-10-124	m	a	2010	496	0.88	-13.24	7.93	6.11	8.12	2.53		1.4	1	6.46	91	0	23	0	3	0	0	0	0	2	0	0	0	4	1024	456.5	1480.5	1	0	1	0	1	0	0	0	0	1	0	0	0	1	1	1	1	1
LM-10-131	m	a	2010	537.44	1.5	18.09	7.93	6.11	8.12	2.53		1.4	1	6.46	178	0	0	0	0	0	0	0	0	0	0	0	1	2	504	455	959	1	0	0	0	0	0	0	0	0	0	0	0	1	1	0	0	1	1
LM-10-136	m	a	2010	503.08	0.21	4.95	7.93	6.11	8.12	2.53		1.4	1	6.46	52	0	0	0	0	0	0	0	0	1	0	0	3	3	372	793.5	1165.5	1	0	0	0	0	0	0	0	0	1	0	0	1	1	0	1	1	1
LM-10-139	m	a	2010	525.95	1.53	6.07	7.93	6.11	8.12	2.53		1.4	1	6.46	67	3	7	0	6	0	0	0	0	2	6	0	0	6	1502.5	1116	2618.5	1	1	1	0	1	0	0	0	0	1	1	0	0	1	1	1	1	1
LM-10-140	m	a	2010	476.88	-0.08	-16.59	7.93	6.11	8.12	2.53		1.4	1	6.46	141	0	0	0	2	0	0	0	0	0	0	0	0	2	475.5	158.5	634	1	0	0	0	1	0	0	0	0	0	0	0	0	1	0	0	1	1
LM-10-141	m	a	2010	507	-0.01	12.36	7.93	6.11	8.12	2.53		1.4	1	6.46	3	177	22	0	0	0	0	0	0	0	0	0	0	3	1368	0	1368	1	1	1	0	0	0	0	0	0	0	0	0	0	1	1	0	1	1
LM-10-142	m	a	2010	539	2.49	3.48	7.93	6.11	8.12	2.53		1.4	1	6.46	343	0	5	0	2	0	0	0	0	0	0	0	0	3	1105.5	158.5	1264	1	0	1	0	1	0	0	0	0	0	0	0	0	1	1	0	1	1
LM-10-143	f	a	2010	498	-1.43	26.67	7.93	6.11	8.12	2.53		1.4	1	6.46	8	0	3	0	0	0	0	0	0	0	0	0	0	2	745	0	745	1	0	1	0	0	0	0	0	0	0	0	0	0	1	1	0	1	1
LM-10-198	f	a	2010	482.15	-1.21	7.19	7.93	6.11	8.12	2.53		1.4	1	6.46	184	0	0	0	5	0	0	0	0	1	0	0	1	4	506	929	1435	1	0	0	0	1	0	0	0	0	1	0	0	1	1	0	1	1	1
LM-10-200	m	a	2010	482.94	-0.22	-8.14	7.93	6.11	8.12	2.53		1.4	1	6.46	18	0	0	0	0	0	0	0	0	0	0	0	1	2	276.5	455	731.5	1	0	0	0	0	0	0	0	0	0	0	0	1	1	0	0	1	1
LM-10-207	m	a	2010	560	1.41	42.12	7.93	6.11	8.12	2.53		1.4	1	6.46	0	0	0	0	0	0	0	0	0	0	0	0	0	0	0	0	0	0	0	0	0	0	0	0	0	0	0	0	0	0	0	0	0	1	0
LM-10-208	f	a	2010	477.93	-1.73	11.53	7.93	6.11	8.12	2.53		1.4	1	6.46	13805	12	0	0	6	0	0	0	0	0	0	0	2	4	1203.5	851	2054.5	1	1	0	0	1	0	0	0	0	0	0	0	1	1	0	0	1	1
LM-10-218	m	a	2010	496	2.13	-33.66	7.93	6.11	8.12	2.53		1.4	1	6.46	9	0	0	0	0	0	0	0	0	1	0	0	2	3	231	753	984	1	0	0	0	0	0	0	0	0	1	0	0	1	1	0	1	1	1
LM-10-222	m	a	2010	481.04	0.16	-16.41	7.93	6.11	8.12	2.53		1.4	1	6.46	0	0	0	0	0	0	0	0	0	5	0	0	2	2	0	930.5	930.5	0	0	0	0	0	0	0	0	0	1	0	0	1	0	0	1	1	0
LM-10-225	m	a	2010	540	2.73	0.41	7.93	6.11	8.12	2.53		1.4	1	6.46	3	0	0	0	0	0	0	0	0	0	0	0	0	1	170	0	170	1	0	0	0	0	0	0	0	0	0	0	0	0	1	0	0	1	1
LM-10-243	m	a	2010	490.05	0.93	-20	7.93	6.11	8.12	2.53		1.4	1	6.46	0	0	0	0	1	1	0	0	0	0	0	0	4	3	0	1121	1121	0	0	0	0	1	1	0	0	0	0	0	0	1	0	0	0	1	0
LM-10-258	f	a	2010	424.26	1.47	-94.62	7.93	6.11	8.12	2.53		1.4	1	6.46	27	0	0	0	13	8	0	0	0	1	1	0	0	5	307	1484	1791	1	0	0	0	1	1	0	0	0	1	1	0	0	1	0	1	1	1
LM-10-265	m	a	2010	528.25	2.57	-8.6	7.93	6.11	8.12	2.53		1.4	1	6.46	0	0	0	0	0	0	0	0	0	6	0	0	1	2	0	862	862	0	0	0	0	0	0	0	0	0	1	0	0	1	0	0	1	1	0
LM-10-271	m	a	2010	497.33	1.48	-21.77	7.93	6.11	8.12	2.53		1.4	1	6.46	19	0	0	0	3	0	0	0	0	1	0	0	2	4	280	953	1233	1	0	0	0	1	0	0	0	0	1	0	0	1	1	0	1	1	1
LM-10-272	m	a	2010	514.37	1.58	-6.3	7.93	6.11	8.12	2.53		1.4	1	6.46	158	0	0	0	1	0	0	0	1	1	0	0	0	4	493.5	917.5	1411	1	0	0	0	1	0	0	0	1	1	0	0	0	1	0	1	1	1
LM-10-274	f	a	2010	468	-2.13	8.24	7.93	6.11	8.12	2.53		1.4	1	6.46	12	0	0	1	1	0	0	0	0	4	0	0	0	4	856.5	453.5	1310	1	0	0	1	1	0	0	0	0	1	0	0	0	1	1	1	1	1
LM-10-284	m	a	2010	514.55	0.92	4.78	7.93	6.11	8.12	2.53		1.4	1	6.46	15	0	0	0	0	0	0	0	0	0	0	0	2	2	263	551.5	814.5	1	0	0	0	0	0	0	0	0	0	0	0	1	1	0	0	1	1
LM-10-285	m	a	2010	490	-0.88	9.66	7.93	6.11	8.12	2.53		1.4	1	6.46	0	0	0	0	0	0	0	0	0	3	0	0	0	1	0	302	302	0	0	0	0	0	0	0	0	0	1	0	0	0	0	0	1	1	0
LM-10-291	m	a	2010	504	0.73	-2.68	7.93	6.11	8.12	2.53		1.4	1	6.46	283	0	0	0	0	0	0	0	0	0	0	0	0	1	541	0	541	1	0	0	0	0	0	0	0	0	0	0	0	0	1	0	0	1	1
LM-10-292	m	a	2010	501.47	0.3	1.79	7.93	6.11	8.12	2.53		1.4	1	6.46	460	0	0	5	0	0	0	0	0	0	0	0	0	2	1201	0	1201	1	0	0	1	0	0	0	0	0	0	0	0	0	1	1	0	1	1
LM-10-293	m	a	2010	530.69	0.69	24.58	7.93	6.11	8.12	2.53		1.4	1	6.46	29	0	0	0	2	1	0	0	0	0	0	0	0	3	313	558	871	1	0	0	0	1	1	0	0	0	0	0	0	0	1	0	0	1	1
LM-10-295	f	a	2010	503.5	0.34	3.1	7.93	6.11	8.12	2.53		1.4	1	6.46	3	0	1	0	48	2	0	1	1	0	0	0	0	6	636.5	2193.5	2830	1	0	1	0	1	1	0	1	1	0	0	0	0	1	1	0	1	1
LM-10-307	m	a	2010	539.37	0.67	33.67	7.93	6.11	8.12	2.53		1.4	1	6.46	40	0	0	5	0	0	0	0	0	1	0	0	1	4	971.5	656.5	1628	1	0	0	1	0	0	0	0	0	1	0	0	1	1	1	1	1	1
LM-11-003	m	a	2011	535.11	1.27	19.59	4.28	6.11	8.12	1.98		0.92	0.89	4.83	10	0	0	0	1	0	0	0	0	1	0	0	1	4	238	765	1003	1	0	0	0	1	0	0	0	0	1	0	0	1	1	0	1	1	1
LM-11-009	m	a	2011	547.66	2.45	12.78	4.28	6.11	8.12	1.98		0.92	0.89	4.83	37	0	0	0	0	0	0	0	0	1	0	0	1	3	338	656.5	994.5	1	0	0	0	0	0	0	0	0	1	0	0	1	1	0	1	1	1
LM-11-011	f	a	2011	516.53	-1.98	54.2	4.28	6.11	8.12	1.98		0.92	0.89	4.83	34	0	0	0	0	0	0	0	0	5	2	1	1	5	329	1837.5	2166.5	1	0	0	0	0	0	0	0	0	1	1	1	1	1	0	1	1	1
LM-11-016	m	a	2011	481.2	0.26	-17.83	4.28	6.11	8.12	1.98		0.92	0.89	4.83	106	0	0	0	0	0	0	0	0	0	0	0	1	2	447.5	455	902.5	1	0	0	0	0	0	0	0	0	0	0	0	1	1	0	0	1	1
LM-11-026	m	a	2011	493.2	1.09	-19.35	4.28	6.11	8.12	1.98		0.92	0.89	4.83	15	0	0	0	1	0	0	0	0	0	0	0	2	3	263	660	923	1	0	0	0	1	0	0	0	0	0	0	0	1	1	0	0	1	1
LM-11-027	m	a	2011	504	0.82	-4.13	4.28	6.11	8.12	1.98		0.92	0.89	4.83	214	0	0	0	7	122	0	0	0	1	0	0	3	5	517.5	1733.5	2251	1	0	0	0	1	1	0	0	0	1	0	0	1	1	0	1	1	1
LM-11-031	f	a	2011	483.87	0.22	-14.47	4.28	6.11	8.12	1.98		0.92	0.89	4.83	74	16	0	0	2	0	0	0	0	2	0	0	0	4	981	415	1396	1	1	0	0	1	0	0	0	0	1	0	0	0	1	0	1	1	1
LM-11-033	m	a	2011	480.11	0.63	-24.9	4.28	6.11	8.12	1.98		0.92	0.89	4.83	7	0	0	0	6	0	0	0	0	21	0	0	2	4	211.5	1436.5	1648	1	0	0	0	1	0	0	0	0	1	0	0	1	1	0	1	1	1
LM-11-034	m	a	2011	539.77	1.92	13.59	4.28	6.11	8.12	1.98		0.92	0.89	4.83	16	0	0	0	6	1	0	2	0	2	0	0	0	5	267	1544.5	1811.5	1	0	0	0	1	1	0	1	0	1	0	0	0	1	0	1	1	1
LM-11-048	m	a	2011	511.59	0.6	6.95	4.28	6.11	8.12	1.98		0.92	0.89	4.83	17	0	0	0	1	1	0	0	1	0	0	0	2	5	272	1667	1939	1	0	0	0	1	1	0	0	1	0	0	0	1	1	0	0	1	1
LM-11-088	f	a	2011	458.39	-3.48	20.78	4.28	6.11	8.12	1.98		0.92	0.89	4.83	114	0	62	0	3	0	1	0	0	8	2	0	0	6	1073	1612	2685	1	0	1	0	1	0	1	0	0	1	1	0	0	1	1	1	1	1
LM-11-101	f	a	2011	478.84	-1.22	4.1	4.28	6.11	8.12	1.98		0.92	0.89	4.83	0	0	13	0	56	1	15	1	2	1	0	0	0	7	575.5	2981.5	3557	0	0	1	0	1	1	1	1	1	1	0	0	0	0	1	1	1	1
LM-11-104	m	a	2011	552.58	1.52	32.89	4.28	6.11	8.12	1.98		0.92	0.89	4.83	0	0	0	1	0	0	0	0	0	0	0	0	0	1	607	0	607	0	0	0	1	0	0	0	0	0	0	0	0	0	0	1	0	1	1
LM-11-117	m	a	2011	515.27	1.41	-2.63	4.28	6.11	8.12	1.98		0.92	0.89	4.83	22	0	0	0	1	0	0	0	0	1	0	0	0	3	295	310	605	1	0	0	0	1	0	0	0	0	1	0	0	0	1	0	1	1	1
LM-11-120	f	a	2011	505.27	-0.76	23.03	4.28	6.11	8.12	1.98		0.92	0.89	4.83	20	0	2	0	2	0	0	0	0	2	6	0	0	5	787	975	1762	1	0	1	0	1	0	0	0	0	1	1	0	0	1	1	1	1	1
LM-11-126	f	a	2011	500.78	-1.68	33.52	4.28	6.11	8.12	1.98		0.92	0.89	4.83	21	0	8	0	1	0	0	0	0	13	4	1	2	7	848	2272.5	3120.5	1	0	1	0	1	0	0	0	0	1	1	1	1	1	1	1	1	1
LM-11-130	m	a	2011	509	-0.62	24.34	4.28	6.11	8.12	1.98		0.92	0.89	4.83	0	0	2	0	2	0	0	0	0	0	0	0	1	3	502.5	613.5	1116	0	0	1	0	1	0	0	0	0	0	0	0	1	0	1	0	1	1
LM-11-131	m	a	2011	505.07	0.72	-1.54	4.28	6.11	8.12	1.98		0.92	0.89	4.83	58	0	0	0	0	2	0	0	0	0	0	0	1	3	378.5	894	1272.5	1	0	0	0	0	1	0	0	0	0	0	0	1	1	0	0	1	1
LM-11-132	f	a	2011	442	-1.9	-21.66	4.28	6.11	8.12	1.98		0.92	0.89	4.83	26	0	0	0	11	0	0	0	0	13	5	0	4	5	305	2086	2391	1	0	0	0	1	0	0	0	0	1	1	0	1	1	0	1	1	1
LM-11-133	m	a	2011	529	0.5	26.05	4.28	6.11	8.12	1.98		0.92	0.89	4.83	22	0	0	0	0	0	0	0	0	0	0	0	1	2	295	455	750	1	0	0	0	0	0	0	0	0	0	0	0	1	1	0	0	1	1
LM-11-135	m	a	2011	552.18	1.69	29.73	4.28	6.11	8.12	1.98		0.92	0.89	4.83	114	0	0	0	0	0	0	0	0	0	0	0	3	2	455	592	1047	1	0	0	0	0	0	0	0	0	0	0	0	1	1	0	0	1	1
LM-11-145	m	a	2011	530.03	1.38	12.62	4.28	6.11	8.12	1.98		0.92	0.89	4.83	16	0	41	0	1	93	0	0	0	0	4	0	0	5	876.5	1233.5	2110	1	0	1	0	1	1	0	0	0	0	1	0	0	1	1	1	1	1
LM-11-147	m	a	2011	513.47	1.07	1.23	4.28	6.11	8.12	1.98		0.92	0.89	4.83	8	62	0	0	1	0	0	0	1	3	0	0	0	5	812.5	1018	1830.5	1	1	0	0	1	0	0	0	1	1	0	0	0	1	0	1	1	1
LM-11-148	m	a	2011	501.12	2.01	-26.65	4.28	6.11	8.12	1.98		0.92	0.89	4.83	12	0	0	0	1	0	0	0	0	5	2	0	0	4	249.5	928.5	1178	1	0	0	0	1	0	0	0	0	1	1	0	0	1	0	1	1	1
LM-11-155	f	a	2011	495.9	0.33	-4.3	4.28	6.11	8.12	1.98		0.92	0.89	4.83	255	0	0	0	21	0	0	0	0	7	0	0	2	4	531	1491.5	2022.5	1	0	0	0	1	0	0	0	0	1	0	0	1	1	0	1	1	1
LM-11-156	m	a	2011	538.16	2.43	3.63	4.28	6.11	8.12	1.98		0.92	0.89	4.83	0	0	0	0	4	0	0	0	0	0	0	0	7	2	0	866	866	0	0	0	0	1	0	0	0	0	0	0	0	1	0	0	0	1	0
LM-11-157	f	a	2011	482.99	-1.72	16.42	4.28	6.11	8.12	1.98		0.92	0.89	4.83	9	0	0	1	0	2	0	0	0	3	1	0	0	5	838	1104	1942	1	0	0	1	0	1	0	0	0	1	1	0	0	1	1	1	1	1
LM-11-165	f	a	2011	467	-2.08	6.42	4.28	6.11	8.12	1.98		0.92	0.89	4.83	35	0	10	0	7	6	0	0	0	34	18	0	0	6	901	2031.5	2932.5	1	0	1	0	1	1	0	0	0	1	1	0	0	1	1	1	1	1
LM-11-169	f	a	2011	454.87	-2.43	-0.04	4.28	6.11	8.12	1.98		0.92	0.89	4.83	70	0	48	0	5	7	0	0	0	4	3	0	0	6	1010.5	1593	2603.5	1	0	1	0	1	1	0	0	0	1	1	0	0	1	1	1	1	1
LM-11-171	f	a	2011	479.94	-0.95	0.73	4.28	6.11	8.12	1.98		0.92	0.89	4.83	144	0	2	5	2	1	0	0	0	9	0	0	1	7	1604.5	1494	3098.5	1	0	1	1	1	1	0	0	0	1	0	0	1	1	1	1	1	1
LM-11-175	f	a	2011	482.55	-1	4.26	4.28	6.11	8.12	1.98		0.92	0.89	4.83	32	0	0	0	1	0	0	0	0	0	2	3	0	4	324	1135	1459	1	0	0	0	1	0	0	0	0	0	1	1	0	1	0	1	1	1
LM-11-177	m	a	2011	512.88	2.31	-19.81	4.28	6.11	8.12	1.98		0.92	0.89	4.83	35	0	4	0	0	0	0	0	0	3	0	0	1	4	866.5	757	1623.5	1	0	1	0	0	0	0	0	0	1	0	0	1	1	1	1	1	1
LM-11-190	f	a	2011	484.18	-1.07	6.94	4.28	6.11	8.12	1.98		0.92	0.89	4.83	7	0	0	0	0	0	0	0	1	3	0	0	0	3	211.5	909.5	1121	1	0	0	0	0	0	0	0	1	1	0	0	0	1	0	1	1	1
LM-11-191	f	a	2011	467	0.39	-34.21	4.28	6.11	8.12	1.98		0.92	0.89	4.83	0	53	0	0	0	0	0	0	0	1	0	0	0	2	589	201.5	790.5	0	1	0	0	0	0	0	0	0	1	0	0	0	1	0	1	1	1
LM-11-202	f	a	2011	511.7	0.05	16.07	4.28	6.11	8.12	1.98		0.92	0.89	4.83	4	0	0	0	14	0	0	0	0	4	8	1	1	6	182	2382.5	2564.5	1	0	0	0	1	0	0	0	0	1	1	1	1	1	0	1	1	1
LM-11-203	m	a	2011	570.09	1.94	43.48	4.28	6.11	8.12	1.98		0.92	0.89	4.83	24	0	41	0	1	0	0	0	0	5	2	0	2	6	912	1480	2392	1	0	1	0	1	0	0	0	0	1	1	0	1	1	1	1	1	1
LM-11-209	m	a	2011	532.03	1.98	4.88	4.28	6.11	8.12	1.98		0.92	0.89	4.83	0	3	0	0	1	0	0	0	0	0	0	0	0	2	556	108.5	664.5	0	1	0	0	1	0	0	0	0	0	0	0	0	1	0	0	1	1
LM-11-210	m	a	2011	511.61	1.56	-8.73	4.28	4.03	6.11	1.98		0.92	0.89	4.83	0	0	0	0	0	0	0	0	0	6	0	0	1	2	0	862	862	0	0	0	0	0	0	0	0	0	1	0	0	1	0	0	1	1	0
LM-11-260	m	a	2011	528.41	1.06	16.26	4.28	4.03	6.11	1.98		0.92	0.89	4.83	7	258	0	0	0	0	0	0	0	0	0	0	0	2	822.5	0	822.5	1	1	0	0	0	0	0	0	0	0	0	0	0	1	0	0	1	1
LM-11-261	m	a	2011	473.04	0.18	-24.6	4.28	4.03	6.11	1.98		0.92	0.89	4.83	52	85	0	0	2	0	0	0	0	2	0	0	1	5	967	870	1837	1	1	0	0	1	0	0	0	0	1	0	0	1	1	0	1	1	1
LM-11-263	m	a	2011	537.04	3.43	-13.93	4.28	4.03	6.11	1.98		0.92	0.89	4.83	0	0	0	0	1	0	4	3	1	0	0	0	0	4	0	1877	1877	0	0	0	0	1	0	1	1	1	0	0	0	0	0	0	0	1	0
LM-12-014	f	a	2012	452	-2.36	-3.96	3.53	4.03	6.11	1.8		0.84	0.84	7.89	0	0	1	0	13	12	0	0	1	0	0	0	2	5	466.5	2096	2562.5	0	0	1	0	1	1	0	0	1	0	0	0	1	0	1	0	1	1
LM-12-016	m	a	2012	533	2.36	-0.4	3.53	4.03	6.11	1.8		0.84	0.84	7.89	10	0	0	0	18	0	0	0	0	1	0	0	0	3	238	674	912	1	0	0	0	1	0	0	0	0	1	0	0	0	1	0	1	1	1
LM-12-019	f	a	2012	483.55	-0.63	-0.85	3.53	4.03	6.11	1.8		0.84	0.84	7.89	0	0	0	0	38	0	0	0	0	7	0	0	0	2	0	1005	1005	0	0	0	0	1	0	0	0	0	1	0	0	0	0	0	1	1	0
LM-12-028	m	a	2012	544.1	0.79	36.4	3.53	4.03	6.11	1.8		0.84	0.84	7.89	61	0	6	0	0	11	0	0	0	0	0	0	1	4	932	963	1895	1	0	1	0	0	1	0	0	0	0	0	0	1	1	1	0	1	1
LM-12-035	m	a	2012	564.62	3.49	12.55	3.53	4.03	6.11	1.8		0.84	0.84	7.89	0	0	0	0	2	0	0	0	0	0	0	0	1	2	0	613.5	613.5	0	0	0	0	1	0	0	0	0	0	0	0	1	0	0	0	1	0
LM-12-036	m	a	2012	524.84	1.64	3.27	3.53	4.03	6.11	1.8		0.84	0.84	7.89	0	0	7	0	3	0	0	0	0	0	0	0	3	3	552.5	792	1344.5	0	0	1	0	1	0	0	0	0	0	0	0	1	0	1	0	1	1
LM-12-040	m	a	2012	529.91	-0.03	35.71	3.53	4.03	6.11	1.8		0.84	0.84	7.89	13	0	0	0	10	3	0	0	0	1	1	0	0	5	256.5	1404.5	1661	1	0	0	0	1	1	0	0	0	1	1	0	0	1	0	1	1	1
LM-12-058	m	a	2012	488	2.38	-45.82	3.53	4.03	6.11	1.8		0.84	0.84	7.89	1460	0	0	0	0	1	0	0	0	0	0	0	0	2	618	399.5	1017.5	1	0	0	0	0	1	0	0	0	0	0	0	0	1	0	0	1	1
LM-12-060	m	a	2012	516.35	1.77	-7.44	3.53	4.03	6.11	1.8		0.84	0.84	7.89	0	0	0	0	23	0	0	0	0	2	3	0	1	4	0	1708.5	1708.5	0	0	0	0	1	0	0	0	0	1	1	0	1	0	0	1	1	0
LM-12-067	m	a	2012	602.3	3.68	47.23	3.53	4.03	6.11	1.8		0.84	0.84	7.89	40	0	5	0	19	0	0	0	0	2	0	0	0	4	889	738.5	1627.5	1	0	1	0	1	0	0	0	0	1	0	0	0	1	1	1	1	1
LM-12-068	m	a	2012	562	1.78	38.07	3.53	4.03	6.11	1.8		0.84	0.84	7.89	0	3	5	0	0	0	0	0	0	0	0	0	0	2	1097.5	0	1097.5	0	1	1	0	0	0	0	0	0	0	0	0	0	1	1	0	1	1
LM-12-069	f	a	2012	453.67	-1.75	-12.42	3.53	4.03	6.11	1.8		0.84	0.84	7.89	5	0	0	0	47	17	0	0	0	0	0	0	2	4	191.5	1663.5	1855	1	0	0	0	1	1	0	0	0	0	0	0	1	1	0	0	1	1
LM-12-071	m	a	2012	530.84	2.81	-10	3.53	4.03	6.11	1.8		0.84	0.84	7.89	1	0	0	0	34	0	0	0	1	0	0	0	1	4	141.5	1620	1761.5	1	0	0	0	1	0	0	0	1	0	0	0	1	1	0	0	1	1
LM-12-072	m	a	2012	570.55	2.6	33.11	3.53	4.03	6.11	1.8		0.84	0.84	7.89	10	0	0	0	110	135	0	0	1	0	0	0	0	4	238	1847.5	2085.5	1	0	0	0	1	1	0	0	1	0	0	0	0	1	0	0	1	1
LM-12-075	m	a	2012	571.84	3.93	12.58	3.53	4.03	6.11	1.8		0.84	0.84	7.89	0	10	0	0	20	0	0	0	0	4	1	0	0	4	569.5	1199	1768.5	0	1	0	0	1	0	0	0	0	1	1	0	0	1	0	1	1	1
LM-12-089	m	a	2012	486.46	-1.9	22.81	3.53	4.03	6.11	1.8		0.84	0.84	7.89	29	0	0	0	8	1	0	0	0	0	3	0	1	5	313	1688	2001	1	0	0	0	1	1	0	0	0	0	1	0	1	1	0	1	1	1
LM-12-090	m	a	2012	544.68	1.96	17.74	3.53	4.03	6.11	1.8		0.84	0.84	7.89	50	0	0	0	25	0	0	0	0	0	0	0	1	3	368.5	979	1347.5	1	0	0	0	1	0	0	0	0	0	0	0	1	1	0	0	1	1
LM-12-092	f	a	2012	455	-2.48	0.98	3.53	4.03	6.11	1.8		0.84	0.84	7.89	0	75	0	0	126	48	0	0	0	6	6	0	0	5	593	2174.5	2767.5	0	1	0	0	1	1	0	0	0	1	1	0	0	1	0	1	1	1
LM-12-109	f	a	2012	475	-1.28	1.22	3.53	4.03	6.11	1.8		0.84	0.84	7.89	32	0	1	0	28	0	0	0	0	0	0	0	0	3	790.5	534	1324.5	1	0	1	0	1	0	0	0	0	0	0	0	0	1	1	0	1	1
LM-12-141	m	a	2012	518.29	0.78	10.72	3.53	4.03	6.11	1.8		0.84	0.84	7.89	43	0	2	0	6	0	0	0	0	1	0	0	0	4	858.5	501	1359.5	1	0	1	0	1	0	0	0	0	1	0	0	0	1	1	1	1	1
LM-12-142	m	a	2012	517	0.19	19.2	3.53	4.03	6.11	1.8		0.84	0.84	7.89	0	0	0	0	16	0	0	0	0	0	1	0	0	2	0	818.5	818.5	0	0	0	0	1	0	0	0	0	0	1	0	0	0	0	1	1	0
LM-12-144	m	a	2012	474.85	-1.89	11.17	3.53	4.03	6.11	1.8		0.84	0.84	7.89	5	0	8	0	17	0	0	0	0	17	0	0	1	5	750	1480	2230	1	0	1	0	1	0	0	0	0	1	0	0	1	1	1	1	1	1
LM-12-146	m	a	2012	520.63	0.86	11.86	3.53	4.03	6.11	1.8		0.84	0.84	7.89	3	0	44	0	2	0	0	0	0	0	0	0	1	4	781	613.5	1394.5	1	0	1	0	1	0	0	0	0	0	0	0	1	1	1	0	1	1
LM-12-162	m	a	2012	549.54	0.83	41.23	3.53	4.03	6.11	1.8		0.84	0.84	7.89	21	0	0	0	13	0	4	6	0	1	0	0	1	6	289.5	2259	2548.5	1	0	0	0	1	0	1	1	0	1	0	0	1	1	0	1	1	1
LM-12-167	m	a	2012	510	0.72	3.45	3.53	4.03	6.11	1.8		0.84	0.84	7.89	0	0	0	0	1	0	0	0	0	0	0	0	0	1	0	108.5	108.5	0	0	0	0	1	0	0	0	0	0	0	0	0	0	0	0	1	0
LM-12-172	m	a	2012	556.94	1.39	39.38	3.53	4.03	6.11	1.8		0.84	0.84	7.89	0	0	0	0	4	0	0	0	0	0	0	0	4	2	0	852	852	0	0	0	0	1	0	0	0	0	0	0	0	1	0	0	0	1	0
LM-12-173	m	a	2012	511.59	0.54	8.02	3.53	4.03	6.11	1.8		0.84	0.84	7.89	9	0	0	0	18	1	0	0	0	0	0	0	0	3	231	872	1103	1	0	0	0	1	1	0	0	0	0	0	0	0	1	0	0	1	1
LM-12-176	m	a	2012	529.24	1.13	16.03	3.53	4.03	6.11	1.8		0.84	0.84	7.89	31	0	0	0	17	0	0	0	0	1	0	0	0	3	321	663.5	984.5	1	0	0	0	1	0	0	0	0	1	0	0	0	1	0	1	1	1
LM-12-192	m	a	2012	548.57	2.88	6.63	3.53	4.03	6.11	1.8		0.84	0.84	7.89	8	0	0	0	1	0	1	0	0	8	1	0	0	5	221.5	1442.5	1664	1	0	0	0	1	0	1	0	0	1	1	0	0	1	0	1	1	1
LM-12-196	f	a	2012	492.21	-1.98	29.9	3.53	4.03	6.11	1.8		0.84	0.84	7.89	1	0	0	0	21	0	0	0	0	10	4	0	0	4	141.5	1517	1658.5	1	0	0	0	1	0	0	0	0	1	1	0	0	1	0	1	1	1
LM-12-197	f	a	2012	519.11	0.27	19.93	3.53	4.03	6.11	1.8		0.84	0.84	7.89	0	0	0	0	15	0	0	0	0	0	0	0	0	1	0	446	446	0	0	0	0	1	0	0	0	0	0	0	0	0	0	0	0	1	0
LM-12-213	m	a	2012	529	1.91	2.96	3.53	4.03	6.11	1.8		0.84	0.84	7.89	10	0	0	0	2	0	0	0	0	0	7	0	0	3	238	733	971	1	0	0	0	1	0	0	0	0	0	1	0	0	1	0	1	1	1
LM-12-217	m	a	2012	534.78	-0.03	40.56	3.53	4.03	6.11	1.8		0.84	0.84	7.89	14	0	4	0	35	4	0	0	0	4	0	0	0	5	794	1375.5	2169.5	1	0	1	0	1	1	0	0	0	1	0	0	0	1	1	1	1	1
LM-12-374	m	a	2012	525.62	0.22	27.29	3.53	4.03	6.11	1.8		0.84	0.84	7.89	38	0	0	0	24	3	0	0	0	2	0	0	0	4	341	1233	1574	1	0	0	0	1	1	0	0	0	1	0	0	0	1	0	1	1	1
LM-12-375	m	a	2012	549.8	1.56	29.46	3.53	4.03	6.11	1.8		0.84	0.84	7.89	210	70	0	0	6	0	0	0	0	0	0	0	1	4	1107	754.5	1861.5	1	1	0	0	1	0	0	0	0	0	0	0	1	1	0	0	1	1
LM-12-383	m	a	2012	497	0.3	-2.63	3.53	4.03	6.11	1.8		0.84	0.84	7.89	0	0	2	0	1	0	0	0	0	1	0	0	0	3	502.5	310	812.5	0	0	1	0	1	0	0	0	0	1	0	0	0	0	1	1	1	1
LM-12-394	m	a	2012	530	0.49	27.22	3.53	4.03	6.11	1.8		0.84	0.84	7.89	21	0	0	0	17	1	0	0	0	1	0	0	1	5	289.5	1518	1807.5	1	0	0	0	1	1	0	0	0	1	0	0	1	1	0	1	1	1
LM-12-397	f	a	2012	496.11	-1	17.82	3.53	4.03	6.11	1.8		0.84	0.84	7.89	44	0	0	0	44	1	0	0	0	0	0	0	0	3	360	979	1339	1	0	0	0	1	1	0	0	0	0	0	0	0	1	0	0	1	1
LM-12-398	m	a	2012	527.52	0.59	23.14	3.53	4.03	6.11	1.8		0.84	0.84	7.89	0	0	7	0	2	0	0	0	0	0	4	0	0	3	552.5	678.5	1231	0	0	1	0	1	0	0	0	0	0	1	0	0	0	1	1	1	1
LM-12-403	f	a	2012	494.41	-1.83	29.69	3.53	4.03	6.11	1.8		0.84	0.84	7.89	13	0	0	0	121	0	0	0	0	0	0	0	0	2	256.5	625	881.5	1	0	0	0	1	0	0	0	0	0	0	0	0	1	0	0	1	1
LM-06-001	m	j	2006	508	1.85	-17.09	6.11	4.03	6.11		3.45	1.29	0.87	6.53	615	0	0	0	15	0	59	0	0	6	0	0	0	4	592	1479	2071	1	0	0	0	1	0	1	0	0	1	0	0	0	1	0	1	1	1
LM-06-002	m	j	2006	523	3.37	-27.04	6.11	4.03	6.11		3.45	1.29	0.87	6.53	269	0	0	0	9	29	23	2	0	14	1	0	1	8	536.5	3471	4007.5	1	0	0	0	1	1	1	1	0	1	1	0	1	1	0	1	1	1
LM-06-003	m	j	2006	460	1.98	-67.22	6.11	4.03	6.11		3.45	1.29	0.87	6.53	43	0	3	0	12	19	0	0	0	21	0	38	3	7	879.5	2748	3627.5	1	0	1	0	1	1	0	0	0	1	0	1	1	1	1	1	1	1
LM-06-006	f	j	2006	524	-2.63	72.36	6.11	4.03	6.11		3.45	1.29	0.87	6.53	934	0	0	0	14	0	2	5	0	15	3	0	0	6	609	2620.5	3229.5	1	0	0	0	1	0	1	1	0	1	1	0	0	1	0	1	1	1
LM-06-007	f	j	2006	458	-0.35	-30.95	6.11	4.03	6.11		3.45	1.29	0.87	6.53	1275	0	0	0	3	0	0	0	0	101	8	0	0	4	615	1417	2032	1	0	0	0	1	0	0	0	0	1	1	0	0	1	0	1	1	1
LM-06-009	m	j	2006	566	2.46	30.88	6.11	4.03	6.11		3.45	1.29	0.87	6.53	163	0	0	0	6	0	1	0	0	21	3	0	1	6	496	2332	2828	1	0	0	0	1	0	1	0	0	1	1	0	1	1	0	1	1	1
LM-06-010	f	j	2006	411	-2.62	-40.71	6.11	4.03	6.11		3.45	1.29	0.87	6.53	63	0	0	0	8	0	0	1	0	12	1	0	4	6	388.5	2402	2790.5	1	0	0	0	1	0	0	1	0	1	1	0	1	1	0	1	1	1
LM-06-011	f	j	2006	416	-1.95	-46.72	6.11	4.03	6.11		3.45	1.29	0.87	6.53	22	0	0	0	7	0	0	0	1	7	1	0	5	6	295	2358.5	2653.5	1	0	0	0	1	0	0	0	1	1	1	0	1	1	0	1	1	1
LM-06-012	f	j	2006	437	-2.21	-21.42	6.11	4.03	6.11		3.45	1.29	0.87	6.53	291	0	0	0	9	9	0	0	0	7	1	0	3	6	543	2256.5	2799.5	1	0	0	0	1	1	0	0	0	1	1	0	1	1	0	1	1	1
LM-06-014	f	j	2006	448	-1.21	-26.84	6.11	4.03	6.11		3.45	1.29	0.87	6.53	755	0	0	0	5	0	4	0	0	2	0	0	0	4	600	1085	1685	1	0	0	0	1	0	1	0	0	1	0	0	0	1	0	1	1	1
LM-06-015	m	j	2006	529	2.03	1.03	6.11	4.03	6.11		3.45	1.29	0.87	6.53	274	0	12	0	9	39	7	4	0	7	1	1	0	9	1111.5	3483	4594.5	1	0	1	0	1	1	1	1	0	1	1	1	0	1	1	1	1	1
LM-06-016	m	j	2006	392	-2.14	-67.59	6.11	4.03	6.11		3.45	1.29	0.87	6.53	850	0	1	0	8	0	1	2	0	9	0	0	1	7	1071.5	2379.5	3451	1	0	0	0	1	0	1	1	0	1	0	0	1	1	0	1	1	1
LM-06-017	f	j	2006	422	-1.35	-50.6	6.11	4.03	6.11		3.45	1.29	0.87	6.53	294	2	0	0	5	0	1	0	0	3	0	0	2	6	1093.5	1632.5	2726	1	1	0	0	1	0	1	0	0	1	0	0	1	1	0	1	1	1
LM-06-018	m	j	2006	434	-0.4	-54.14	6.11	4.03	6.11		3.45	1.29	0.87	6.53	714	0	2	0	2	2	1	0	0	12	0	0	0	6	1098.5	1624	2722.5	1	0	1	0	1	1	1	0	0	1	0	0	0	1	1	1	1	1
LM-06-021	f	j	2006	468	1.74	-55.29	6.11	4.03	6.11		3.45	1.29	0.87	6.53	4	0	29	0	14	20	0	0	0	7	2	7	0	7	784.5	2447	3231.5	1	0	1	0	1	1	0	0	0	1	1	1	0	1	1	1	1	1
LM-06-022	f	j	2006	451	-1.09	-25.87	6.11	4.03	6.11		3.45	1.29	0.87	6.53	72	1284	0	0	12	11	79	0	0	1	1	0	0	7	1027	2115.5	3142.5	1	1	0	0	1	1	1	0	0	1	1	0	0	1	0	1	1	1
LM-06-029	m	j	2006	513	3.4	-37.46	6.11	4.03	6.11		3.45	1.29	0.87	6.53	322	0	0	0	4	0	50	0	0	4	0	0	0	4	557.5	1207.5	1765	1	0	0	0	1	0	1	0	0	1	0	0	0	1	0	1	1	1
LM-06-030	m	j	2006	553	2.53	16.72	6.11	4.03	6.11		3.45	1.29	0.87	6.53	474	166	0	0	5	0	3	0	0	3	0	0	3	6	1183.5	1714	2897.5	1	1	0	0	1	0	1	0	0	1	0	0	1	1	0	1	1	1
LM-06-034	m	j	2006	520	1.17	6.02	6.11	4.03	6.11		3.45	1.29	0.87	6.53	54	0	0	0	7	3	0	0	0	8	1	0	0	5	375	1613	1988	1	0	0	0	1	1	0	0	0	1	1	0	0	1	0	1	1	1
LM-06-035	f	j	2006	459	-2.25	1.11	6.11	4.03	6.11		3.45	1.29	0.87	6.53	30	6	0	0	0	0	1	6	0	4	0	0	0	5	881	1473.5	2354.5	1	1	0	0	0	0	1	1	0	1	0	0	0	1	0	1	1	1
LM-06-036	m	j	2006	511	3.66	-43.85	6.11	4.03	6.11		3.45	1.29	0.87	6.53	214	898	0	0	2	0	0	0	0	2	0	0	1	5	1142.5	870	2012.5	1	1	0	0	1	0	0	0	0	1	0	0	1	1	0	1	1	1
LM-06-037	f	j	2006	440	-2.01	-21.85	6.11	4.03	6.11		3.45	1.29	0.87	6.53	304	0	0	0	14	126	0	0	0	4	1	0	0	5	550	1755.5	2305.5	1	0	0	0	1	1	0	0	0	1	1	0	0	1	0	1	1	1
LM-06-039	f	j	2006	503	0.91	-6.72	6.11	4.03	6.11		3.45	1.29	0.87	6.53	124	0	0	0	7	0	0	0	0	6	3	0	0	4	461	1219.5	1680.5	1	0	0	0	1	0	0	0	0	1	1	0	0	1	0	1	1	1
LM-06-040	m	j	2006	505	-0.04	10.95	6.11	4.03	6.11		3.45	1.29	0.87	6.53	204	8	0	0	21	0	0	0	0	71	4	0	0	5	1079.5	1643.5	2723	1	1	0	0	1	0	0	0	0	1	1	0	0	1	0	1	1	1
LM-06-041	m	j	2006	461	1.1	-51.77	6.11	4.03	6.11		3.45	1.29	0.87	6.53	422	14	0	4	28	0	0	1	0	14	3	0	1	8	1769.5	2572.5	4342	1	1	0	1	1	0	0	1	0	1	1	0	1	1	1	1	1	1
LM-06-042	m	j	2006	497	0.84	-11.49	6.11	4.03	6.11		3.45	1.29	0.87	6.53	322	30	1	0	7	0	7	0	0	4	0	0	0	6	1606	1241	2847	1	1	0	0	1	0	1	0	0	1	0	0	0	1	0	1	1	1
LM-06-044	m	j	2006	508	1.18	-6.1	6.11	4.03	6.11		3.45	1.29	0.87	6.53	96	0	0	0	2	0	0	0	0	5	1	0	1	5	436	1355.5	1791.5	1	0	0	0	1	0	0	0	0	1	1	0	1	1	0	1	1	1
LM-06-046	m	j	2006	434	-1.99	-28.14	6.11	4.03	6.11		3.45	1.29	0.87	6.53	70	0	0	2	0	0	0	0	0	38	1	0	0	4	1011.5	973	1984.5	1	0	0	1	0	0	0	0	0	1	1	0	0	1	1	1	0	1
LM-06-047	f	j	2006	470	-0.18	-21.86	6.11	4.03	6.11		3.45	1.29	0.87	6.53	6	2704	1	0	11	0	0	0	0	15	1	0	3	8	1926.5	1902	3828.5	1	1	0	0	1	0	0	0	0	1	1	0	1	1	1	1	1	1
LM-06-048	f	j	2006	455	0.59	-49.43	6.11	4.03	6.11		3.45	1.29	0.87	6.53	40	1428	0	0	39	0	2	1	0	1	0	0	0	6	974.5	1866	2840.5	1	1	0	0	1	0	1	1	0	1	0	0	0	1	0	1	1	1
LM-06-049	m	j	2006	448	-0.37	-40.65	6.11	4.03	6.11		3.45	1.29	0.87	6.53	212	22	0	0	4	0	0	0	0	11	2	0	4	7	1720	1803	3523	1	1	0	0	1	0	0	0	0	1	1	0	1	1	1	1	1	1
LM-06-051	m	j	2006	510	2.2	-20.86	6.11	4.03	6.11		3.45	1.29	0.87	6.53	264	268	1	0	10	6	21	0	0	9	3	0	0	8	1613.5	2437	4050.5	1	1	0	0	1	1	1	0	0	1	1	0	0	1	0	1	1	1
LM-06-059	f	j	2006	492	1.7	-30.65	6.11	4.03	6.11		3.45	1.29	0.87	6.53	814	0	0	0	2	0	0	0	0	16	1	0	0	4	602	1076.5	1678.5	1	0	0	0	1	0	0	0	0	1	1	0	0	1	0	1	1	1
LM-06-071	f	j	2006	444	-1.71	-22.64	6.11	4.03	6.11		3.45	1.29	0.87	6.53	192	12	38	0	15	0	0	0	0	8	0	0	0	5	1691	910.5	2601.5	1	1	1	0	1	0	0	0	0	1	0	0	0	1	1	1	1	1
LM-06-072	m	j	2006	466	0.18	-31.67	6.11	4.03	6.11		3.45	1.29	0.87	6.53	118	6	29	0	77	3	9	0	0	20	10	0	0	8	1624	2828.5	4452.5	1	1	1	0	1	1	1	0	0	1	1	0	0	1	1	1	1	1
LM-06-073	f	j	2006	463	-1.66	-4.51	6.11	4.03	6.11		3.45	1.29	0.87	6.53	1184	0	7	0	0	3	0	0	0	89	25	0	2	6	1166.5	2262.5	3429	1	0	1	0	0	1	0	0	0	1	1	0	1	1	1	1	1	1
LM-06-075	f	j	2006	457	0.25	-41.9	6.11	4.03	6.11		3.45	1.29	0.87	6.53	562	8	21	0	32	0	1	0	0	17	3	26	0	8	1746	2724	4470	1	1	1	0	1	0	1	0	0	1	1	1	0	1	1	1	1	1
LM-06-076	f	j	2006	459	-0.8	-22.61	6.11	4.03	6.11		3.45	1.29	0.87	6.53	6	36	9	0	18	0	0	2	0	10	2	3	1	9	1349.5	3038.5	4388	1	1	1	0	1	0	0	1	0	1	1	1	1	1	1	1	1	1
LM-06-077	m	j	2006	487	0.93	-23.07	6.11	5.58	4.03		3.45	1.29	0.87	6.53	102	426	2	0	3	0	0	0	0	13	2	10	1	8	1563.5	2229.5	3793	1	1	1	0	1	0	0	0	0	1	1	1	1	1	1	1	1	1
LM-06-079	m	j	2006	467	-0.66	-17	6.11	5.58	4.03		3.45	1.29	0.87	6.53	78	0	1	0	17	0	19	0	0	50	3	0	2	7	878	2718.5	3596.5	1	0	0	0	1	0	1	0	0	1	1	0	1	1	0	1	1	1
LM-06-081	f	j	2006	504	0.62	-0.96	6.11	5.58	4.03		3.45	1.29	0.87	6.53	38	0	0	0	30	1	0	0	0	34	9	0	5	6	341	2765.5	3106.5	1	0	0	0	1	1	0	0	0	1	1	0	1	1	0	1	1	1
LM-06-082	m	j	2006	516	2.51	-19.9	6.11	5.58	4.03		3.45	1.29	0.87	6.53	0	86	0	0	1	19	17	0	1	0	0	0	0	5	596.5	1848	2444.5	0	1	0	0	1	1	1	0	1	0	0	0	0	1	0	0	1	1
LM-06-083	m	j	2006	554	4.52	-14.85	6.11	5.58	4.03		3.45	1.29	0.87	6.53	2	0	0	0	39	0	9	2	0	28	3	0	1	7	154.5	3271.5	3426	1	0	0	0	1	0	1	1	0	1	1	0	1	1	0	1	1	1
LM-06-084	f	j	2006	488	1.44	-30.33	6.11	5.58	4.03		3.45	1.29	0.87	6.53	8	0	19	0	73	19	2	3	0	6	3	0	3	9	808.5	3771.5	4580	1	0	1	0	1	1	1	1	0	1	1	0	1	1	1	1	1	1
LM-06-085	m	j	2006	498	1.43	-20.24	6.11	5.58	4.03		3.45	1.29	0.87	6.53	12	0	1	0	29	0	0	0	0	12	8	0	2	6	716	2197	2913	1	0	0	0	1	0	0	0	0	1	1	0	1	1	0	1	1	1
LM-06-086	f	j	2006	438	-2.75	-11.64	6.11	5.58	4.03		3.45	1.29	0.87	6.53	6	0	0	0	10	30	3	1	0	1	9	0	0	7	202	2843	3045	1	0	0	0	1	1	1	1	0	1	1	0	0	1	0	1	1	1
LM-06-087	f	j	2006	432	-2.11	-28.08	6.11	5.58	4.03		3.45	1.29	0.87	6.53	30	0	0	0	36	0	0	0	0	22	3	0	2	5	317	2188.5	2505.5	1	0	0	0	1	0	0	0	0	1	1	0	1	1	0	1	1	1
LM-06-088	f	j	2006	456	-0.47	-31.08	6.11	5.58	4.03		3.45	1.29	0.87	6.53	4	0	0	0	13	22	0	0	0	2	1	0	0	5	182	1585.5	1767.5	1	0	0	0	1	1	0	0	0	1	1	0	0	1	0	1	1	1
LM-06-090	m	j	2006	538	2.37	4.36	6.11	5.58	4.03		3.45	1.29	0.87	6.53	30	0	0	0	5	2	1	2	0	5	0	0	1	8	939	2641	3580	1	0	0	0	1	1	1	1	0	1	0	0	1	1	0	1	1	1
LM-06-091	m	j	2006	536	2.48	0.65	6.11	5.58	4.03		3.45	1.29	0.87	6.53	0	0	0	0	5	18	14	1	0	2	1	0	0	6	0	2570.5	2570.5	0	0	0	0	1	1	1	1	0	1	1	0	0	0	0	1	1	0
LM-06-093	m	j	2006	432	0.07	-63.98	6.11	5.58	4.03		3.45	1.29	0.87	6.53	292	0	0	0	27	1	0	0	0	13	0	3	1	6	544	2500.5	3044.5	1	0	0	0	1	1	0	0	0	1	0	1	1	1	0	1	1	1
LM-06-094	f	j	2006	463	-1.17	-12.64	6.11	5.58	4.03		3.45	1.29	0.87	6.53	1038	0	0	0	60	0	63	1	0	30	7	0	0	6	613	2966.5	3579.5	1	0	0	0	1	0	1	1	0	1	1	0	0	1	0	1	1	1
LM-06-095	m	j	2006	495	0.44	-6.97	6.11	5.58	4.03		3.45	1.29	0.87	6.53	486	0	0	0	3	0	0	0	0	1	0	0	1	4	582	856.5	1438.5	1	0	0	0	1	0	0	0	0	1	0	0	1	1	0	1	1	1
LM-06-096	m	j	2006	529	1.01	17.75	6.11	5.58	4.03		3.45	1.29	0.87	6.53	138	10	3	0	11	62	0	0	0	6	2	0	3	8	1564	2430.5	3994.5	1	1	1	0	1	1	0	0	0	1	1	0	1	1	1	1	1	1
LM-06-099	m	j	2006	466	0.96	-44.46	6.11	5.58	4.03		3.45	1.29	0.87	6.53	128	0	0	0	3	0	0	0	0	18	0	5	1	5	463	1819.5	2282.5	1	0	0	0	1	0	0	0	0	1	0	1	1	1	0	1	1	1
LM-06-100	f	j	2006	458	-0.68	-25.52	6.11	5.58	4.03		3.45	1.29	0.87	6.53	122	0	0	0	11	107	0	0	0	41	5	0	5	6	459.5	2788	3247.5	1	0	0	0	1	1	0	0	0	1	1	0	1	1	0	1	1	1
LM-06-178	f	j	2006	462	-0.73	-20.8	6.11	5.58	4.03		3.45	1.29	0.87	6.53	234	0	0	0	46	0	29	0	0	7	2	0	0	5	527	2079	2606	1	0	0	0	1	0	1	0	0	1	1	0	0	1	0	1	1	1
LM-06-179	f	j	2006	454	-1.06	-23.41	6.11	5.58	4.03		3.45	1.29	0.87	6.53	118	266	0	0	24	0	0	0	0	2	0	0	5	5	1069.5	1397	2466.5	1	1	0	0	1	0	0	0	0	1	0	0	1	1	0	1	1	1
LM-06-181	f	j	2006	491	0.11	-5.59	6.11	5.58	4.03		3.45	1.29	0.87	6.53	148	0	1	0	12	3	0	0	1	37	1	0	2	8	949	3002.5	3951.5	1	0	0	0	1	1	0	0	1	1	1	0	1	1	0	1	1	1
LM-06-187	f	j	2006	480	-1.14	3.95	6.11	5.58	4.03		3.45	1.29	0.87	6.53	344	22	0	0	15	16	1	0	0	6	0	0	0	6	1143.5	1882	3025.5	1	1	0	0	1	1	1	0	0	1	0	0	0	1	0	1	1	1
LM-07-001	f	j	2007	399	-1.56	-70.11	4.03	5.58	4.03		2.3	0.77	0.61	7.64	288	0	5	0	9	0	2	11	0	0	0	0	0	5	1083.5	1527.5	2611	1	0	1	0	1	0	1	1	0	0	0	0	0	1	1	0	1	1
LM-07-002	f	j	2007	419	-2.24	-38.96	4.03	5.58	4.03		2.3	0.77	0.61	7.64	161	2	1	0	3	0	12	3	0	0	0	0	1	7	1510	1846.5	3356.5	1	1	1	0	1	0	1	1	0	0	0	0	1	1	1	0	1	1
LM-07-003	f	j	2007	457.96	-0.78	-23.97	4.03	5.58	4.03		2.3	0.77	0.61	7.64	0	0	0	0	12	0	0	0	0	7	1	0	1	4	0	1670.5	1670.5	0	0	0	0	1	0	0	0	0	1	1	0	1	0	0	1	1	0
LM-07-004	f	j	2007	462.91	-1.99	0.82	4.03	5.58	4.03		2.3	0.77	0.61	7.64	3	0	0	0	7	0	0	0	0	8	1	4	0	5	170	1746.5	1916.5	1	0	0	0	1	0	0	0	0	1	1	1	0	1	0	1	1	1
LM-07-005	f	j	2007	452.14	-2.15	-7.36	4.03	5.58	4.03		2.3	0.77	0.61	7.64	0	0	0	0	29	0	0	0	0	8	0	0	1	3	0	1458	1458	0	0	0	0	1	0	0	0	0	1	0	0	1	0	0	1	1	0
LM-07-006	f	j	2007	445.09	-3.68	10.68	4.03	5.58	4.03		2.3	0.77	0.61	7.64	6	0	0	0	20	0	0	0	0	8	0	0	3	4	202	1547.5	1749.5	1	0	0	0	1	0	0	0	0	1	0	0	1	1	0	1	1	1
LM-07-008	f	j	2007	465.52	-1.4	-6.31	4.03	5.58	4.03		2.3	0.77	0.61	7.64	261	0	0	0	42	0	2	0	0	0	1	0	0	4	533	1476	2009	1	0	0	0	1	0	1	0	0	0	1	0	0	1	0	1	1	1
LM-07-009	m	j	2007	525.76	1.85	0.59	4.03	5.58	4.03		2.3	0.77	0.61	7.64	20	0	0	0	16	0	0	0	0	4	0	0	0	3	284.5	800.5	1085	1	0	0	0	1	0	0	0	0	1	0	0	0	1	0	1	1	1
LM-07-010	f	j	2007	455.83	-0.98	-22.88	4.03	5.58	4.03		2.3	0.77	0.61	7.64	0	0	13	0	58	0	1	1	0	8	0	0	0	5	575.5	2133	2708.5	0	0	1	0	1	0	1	1	0	1	0	0	0	0	1	1	1	1
LM-07-011	f	j	2007	505.68	-0.14	13.22	4.03	5.58	4.03		2.3	0.77	0.61	7.64	0	0	2	0	63	0	65	3	0	17	3	0	0	6	502.5	2890	3392.5	0	0	1	0	1	0	1	1	0	1	1	0	0	0	1	1	1	1
LM-07-014	f	j	2007	411	-3.48	-26.74	4.03	5.58	4.03		2.3	0.77	0.61	7.64	1779	0	0	0	7	0	0	0	0	0	0	0	1	3	622	782	1404	1	0	0	0	1	0	0	0	0	0	0	0	1	1	0	0	1	1
LM-07-018	m	j	2007	495.72	0.49	-7.15	4.03	5.58	4.03		2.3	0.77	0.61	7.64	389	0	0	0	38	0	3	0	0	1	0	0	2	5	573	1867	2440	1	0	0	0	1	0	1	0	0	1	0	0	1	1	0	1	1	1
LM-07-019	m	j	2007	468.24	-0.01	-26.34	4.03	5.58	4.03		2.3	0.77	0.61	7.64	63	1	1	0	20	43	0	0	0	8	7	0	0	7	1394.5	2108	3502.5	1	1	1	0	1	1	0	0	0	1	1	0	0	1	1	1	1	1
LM-07-020	m	j	2007	502	1.63	-19.54	4.03	5.58	4.03		2.3	0.77	0.61	7.64	0	0	2	0	15	0	0	0	0	5	2	0	1	5	502.5	1721	2223.5	0	0	1	0	1	0	0	0	0	1	1	0	1	0	1	1	1	1
LM-07-021	m	j	2007	513.21	2.1	-15.93	4.03	5.58	4.03		2.3	0.77	0.61	7.64	3	2	0	0	32	0	43	0	0	0	1	0	0	5	718.5	1536	2254.5	1	1	0	0	1	0	1	0	0	0	1	0	0	1	0	1	1	1
LM-07-023	f	j	2007	450.27	-1.63	-17.7	4.03	5.58	4.03		2.3	0.77	0.61	7.64	1	0	0	0	23	1	0	0	0	0	0	0	0	3	141.5	911	1052.5	1	0	0	0	1	1	0	0	0	0	0	0	0	1	0	0	1	1
LM-07-024	f	j	2007	489.34	-1.66	21.81	4.03	5.58	4.03		2.3	0.77	0.61	7.64	3	0	0	0	63	0	0	0	0	7	3	0	0	4	170	1532.5	1702.5	1	0	0	0	1	0	0	0	0	1	1	0	0	1	0	1	1	1
LM-07-027	f	j	2007	472.4	-1.4	0.6	4.03	5.58	4.03		2.3	0.77	0.61	7.64	41	0	0	0	49	46	9	0	0	11	8	0	0	6	350.5	2842.5	3193	1	0	0	0	1	1	1	0	0	1	1	0	0	1	0	1	1	1
LM-07-028	f	j	2007	502.84	-0.31	13.17	4.03	5.58	4.03		2.3	0.77	0.61	7.64	0	0	0	0	35	0	1	0	1	6	12	0	0	5	0	2686	2686	0	0	0	0	1	0	1	0	1	1	1	0	0	0	0	1	1	0
LM-07-029	m	j	2007	522.93	-1.24	48.55	4.03	5.58	4.03		2.3	0.77	0.61	7.64	11	350	0	0	20	0	1	1	0	11	0	0	0	6	860	2065.5	2925.5	1	1	0	0	1	0	1	1	0	1	0	0	0	1	0	1	1	1
LM-07-031	m	j	2007	498	2.66	-40.4	4.03	5.58	4.03		2.3	0.77	0.61	7.64	34	1801	0	0	14	85	0	0	0	1	1	0	3	7	957	2189.5	3146.5	1	1	0	0	1	1	0	0	0	1	1	0	1	1	0	1	1	1
LM-07-032	m	j	2007	457	0.77	-50.45	4.03	5.58	4.03		2.3	0.77	0.61	7.64	269	725	0	0	29	0	160	7	0	2	0	0	1	7	1157.5	2506	3663.5	1	1	0	0	1	0	1	1	0	1	0	0	1	1	0	1	1	1
LM-07-034	f	j	2007	429	-2.07	-31.74	4.03	5.58	4.03		2.3	0.77	0.61	7.64	31	0	0	0	3	18	1	0	0	2	0	0	0	5	321	1492	1813	1	0	0	0	1	1	1	0	0	1	0	0	0	1	0	1	1	1
LM-07-037	m	j	2007	484.52	1.66	-37.5	4.03	5.58	4.03		2.3	0.77	0.61	7.64	1826	0	0	0	8	0	1	1	1	9	2	0	0	7	623	2942	3565	1	0	0	0	1	0	1	1	1	1	1	0	0	1	0	1	1	1
LM-07-038	m	j	2007	504.2	0.47	1.81	4.03	5.58	4.03		2.3	0.77	0.61	7.64	236	0	0	0	10	9	0	2	0	10	4	0	0	6	528	2487	3015	1	0	0	0	1	1	0	1	0	1	1	0	0	1	0	1	1	1
LM-07-040	f	j	2007	471	-2.92	24.15	4.03	5.58	4.03		2.3	0.77	0.61	7.64	175	0	0	0	35	0	0	0	0	9	5	56	2	6	501.5	2765	3266.5	1	0	0	0	1	0	0	0	0	1	1	1	1	1	0	1	1	1
LM-07-043	f	j	2007	449.34	-0.43	-38.29	4.03	5.58	4.03		2.3	0.77	0.61	7.64	0	0	0	0	113	0	0	1	0	11	1	0	0	4	0	2055	2055	0	0	0	0	1	0	0	1	0	1	1	0	0	0	0	1	1	0
LM-07-044	m	j	2007	536.25	2.46	1.19	4.03	5.58	4.03		2.3	0.77	0.61	7.64	74	0	0	0	31	4	10	2	0	1	0	0	0	6	406	2387.5	2793.5	1	0	0	0	1	1	1	1	0	1	0	0	0	1	0	1	1	1
LM-07-045	m	j	2007	528.83	1.39	11.22	4.03	5.58	4.03		2.3	0.77	0.61	7.64	0	0	0	0	20	0	12	0	0	7	0	0	0	3	0	1516	1516	0	0	0	0	1	0	1	0	0	1	0	0	0	0	0	1	1	0
LM-07-046	f	j	2007	473	-1.61	4.71	4.03	5.58	4.03		2.3	0.77	0.61	7.64	27	0	0	0	3	0	0	0	0	6	3	0	0	4	307	1092.5	1399.5	1	0	0	0	1	0	0	0	0	1	1	0	0	1	0	1	1	1
LM-07-047	f	j	2007	447	-1.64	-20.93	4.03	5.58	4.03		2.3	0.77	0.61	7.64	2456	0	14	0	11	28	0	0	0	11	0	0	1	7	1204	2546	3750	1	0	1	0	1	1	0	0	0	1	0	0	1	1	1	1	1	1
LM-07-051	f	j	2007	479	-0.96	-0.02	4.03	5.58	4.03		2.3	0.77	0.61	7.64	0	1	2	0	84	0	5	4	1	0	1	0	0	7	1042	2762.5	3804.5	0	1	1	0	1	0	1	1	1	0	1	0	0	1	1	1	1	1
LM-07-052	m	j	2007	487.61	1.51	-31.96	4.03	5.58	4.03		2.3	0.77	0.61	7.64	81	0	0	0	22	0	0	0	0	6	5	0	0	4	419.5	1457.5	1877	1	0	0	0	1	0	0	0	0	1	1	0	0	1	0	1	1	1
LM-07-053	m	j	2007	474.37	1.42	-43.62	4.03	5.58	4.03		2.3	0.77	0.61	7.64	18	0	0	0	10	0	0	0	0	11	0	0	0	3	276.5	891.5	1168	1	0	0	0	1	0	0	0	0	1	0	0	0	1	0	1	1	1
LM-07-054	m	j	2007	511.8	0.61	7.01	4.03	5.58	4.03		2.3	0.77	0.61	7.64	346	0	0	0	10	34	0	0	0	2	0	4	0	5	566	1796.5	2362.5	1	0	0	0	1	1	0	0	0	1	0	1	0	1	0	1	1	1
LM-07-056	f	j	2007	486.38	-0.2	-5.17	4.03	5.58	4.03		2.3	0.77	0.61	7.64	172	172	0	0	8	0	0	0	0	3	2	1	0	6	1103	1653.5	2756.5	1	1	0	0	1	0	0	0	0	1	1	1	0	1	0	1	1	1
LM-07-061	m	j	2007	506.14	0.45	4.04	4.03	5.58	4.03		2.3	0.77	0.61	7.64	39	0	0	0	54	97	17	6	0	7	3	0	0	7	344	3350.5	3694.5	1	0	0	0	1	1	1	1	0	1	1	0	0	1	0	1	1	1
LM-07-064	m	j	2007	515.32	-0.34	26.1	4.03	5.58	4.03		2.3	0.77	0.61	7.64	34	1	0	0	2	0	0	0	0	1	5	0	1	6	868.5	1358	2226.5	1	1	0	0	1	0	0	0	0	1	1	0	1	1	0	1	1	1
LM-07-066	f	j	2007	486.33	-1.27	12.46	4.03	5.58	4.03		2.3	0.77	0.61	7.64	0	0	0	0	7	0	0	0	0	0	0	16	0	2	0	938	938	0	0	0	0	1	0	0	0	0	0	0	1	0	0	0	1	1	0
LM-07-069	m	j	2007	491	-0.89	10.86	4.03	5.58	4.03		2.3	0.77	0.61	7.64	0	0	16	0	19	8	48	2	0	15	5	0	0	7	584.5	3278	3862.5	0	0	1	0	1	1	1	1	0	1	1	0	0	0	1	1	1	1
LM-07-071	m	j	2007	469	1.23	-45.91	4.03	5.58	4.03		2.3	0.77	0.61	7.64	207	0	2	0	7	1	0	0	0	13	2	0	1	7	1015.5	2152.5	3168	1	0	1	0	1	1	0	0	0	1	1	0	1	1	1	1	1	1
LM-07-073	f	j	2007	472.71	-1.41	1.16	4.03	5.58	4.03		2.3	0.77	0.61	7.64	222	0	1	0	20	0	5	0	0	20	5	0	0	6	991	2177.5	3168.5	1	0	1	0	1	0	1	0	0	1	1	0	0	1	1	1	1	1
LM-07-082	m	j	2007	533.9	1.34	17.16	4.03	5.58	4.03		2.3	0.77	0.61	7.64	3	0	0	0	18	18	2	0	0	10	13	0	0	6	170	2640	2810	1	0	0	0	1	1	1	0	0	1	1	0	0	1	0	1	1	1
LM-07-085	m	j	2007	517	1.22	2.18	4.03	5.58	4.03		2.3	0.77	0.61	7.64	0	0	0	0	12	30	0	0	0	1	1	16	0	5	0	2148	2148	0	0	0	0	1	1	0	0	0	1	1	1	0	0	0	1	1	0
LM-07-087	f	j	2007	468	-1.15	-7.96	4.03	5.58	4.03		2.3	0.77	0.61	7.64	0	0	0	0	33	152	9	0	0	7	0	0	0	4	0	2191.5	2191.5	0	0	0	0	1	1	1	0	0	1	0	0	0	0	0	1	1	0
LM-07-091	m	j	2007	510	-0.81	28.58	4.03	5.58	4.03		2.3	0.77	0.61	7.64	5	162	0	0	23	0	0	0	0	19	0	0	0	4	793.5	1087	1880.5	1	1	0	0	1	0	0	0	0	1	0	0	0	1	0	1	1	1
LM-07-092	m	j	2007	549.18	1.63	27.66	4.03	5.58	4.03		2.3	0.77	0.61	7.64	72	6	0	0	18	143	0	0	0	10	2	0	0	6	965	2030	2995	1	1	0	0	1	1	0	0	0	1	1	0	0	1	0	1	1	1
LM-07-094	f	j	2007	414.78	-2.52	-38.72	4.03	5.58	4.03		2.3	0.77	0.61	7.64	924	11	0	0	14	1	0	0	0	14	10	0	0	6	1179	1973	3152	1	1	0	0	1	1	0	0	0	1	1	0	0	1	0	1	1	1
LM-07-095	m	j	2007	469.94	-1.14	-6.1	4.03	5.58	4.03		2.3	0.77	0.61	7.64	0	0	0	0	28	0	2	0	0	0	0	0	0	2	0	1070.5	1070.5	0	0	0	0	1	0	1	0	0	0	0	0	0	0	0	0	1	0
LM-07-096	m	j	2007	502.64	1.08	-9.81	4.03	5.58	4.03		2.3	0.77	0.61	7.64	2944	0	0	0	21	6	3	0	0	3	3	0	1	7	626	2776	3402	1	0	0	0	1	1	1	0	0	1	1	0	1	1	0	1	1	1
LM-07-099	f	j	2007	471	-1.28	-2.74	4.03	5.58	4.03		2.3	0.77	0.61	7.64	0	3	0	0	18	0	1	0	0	13	4	0	0	5	556	2029	2585	0	1	0	0	1	0	1	0	0	1	1	0	0	1	0	1	1	1
LM-07-106	m	j	2007	567.71	2.57	30.77	4.03	5.58	4.03		2.3	0.77	0.61	7.64	2921	0	0	0	23	14	11	3	0	3	3	9	0	8	625	3605	4230	1	0	0	0	1	1	1	1	0	1	1	1	0	1	0	1	1	1
LM-07-108	m	j	2007	497.32	1.56	-22.95	4.03	5.58	4.03		2.3	0.77	0.61	7.64	81	341	0	0	7	0	0	0	0	10	0	0	0	4	1034.5	822.5	1857	1	1	0	0	1	0	0	0	0	1	0	0	0	1	0	1	1	1
LM-07-109	f	j	2007	465.18	-1.15	-10.67	4.03	5.58	4.03		2.3	0.77	0.61	7.64	0	0	0	0	76	76	0	0	0	20	17	0	0	4	0	2402.5	2402.5	0	0	0	0	1	1	0	0	0	1	1	0	0	0	0	1	1	0
LM-07-110	m	j	2007	445.38	-2.39	-10.15	4.03	5.58	4.03		2.3	0.77	0.61	7.64	0	0	0	0	21	21	0	0	1	17	1	0	0	5	0	2573.5	2573.5	0	0	0	0	1	1	0	0	1	1	1	0	0	0	0	1	1	0
LM-07-111	f	j	2007	488.99	-1.08	11.95	4.03	7.35	5.58		2.3	0.77	0.61	7.64	6	0	0	0	69	0	1	0	0	23	1	0	0	5	202	2071	2273	1	0	0	0	1	0	1	0	0	1	1	0	0	1	0	1	1	1
LM-07-118	m	j	2007	499.6	0.87	-9.42	4.03	7.35	5.58		2.3	0.77	0.61	7.64	1	0			28	16	0	0	0	17	6	1	0	6	2031.5	2742	4773.5	1	0	0	0	1	1	0	0	0	1	1	1	0	1	0	1	1	1
LM-07-121	f	j	2007	469	-2.76	19.47	4.03	7.35	5.58		2.3	0.77	0.61	7.64	15	1	0	0	40	104	1	3	0	7	4	0	0	8	802.5	3252	4054.5	1	1	0	0	1	1	1	1	0	1	1	0	0	1	0	1	1	1
LM-07-142	f	j	2007	490.54	-0.92	10.93	4.03	7.35	5.58		2.3	0.77	0.61	7.64	10	0	0	0	35	1	24	1	0	0	3	0	0	6	238	2612	2850	1	0	0	0	1	1	1	1	0	0	1	0	0	1	0	1	1	1
LM-07-145	m	j	2007	512	0.59	7.54	4.03	7.35	5.58		2.3	0.77	0.61	7.64	18	5	0	0	21	1	11	0	0	5	0	0	0	6	838.5	1863	2701.5	1	1	0	0	1	1	1	0	0	1	0	0	0	1	0	1	1	1
LM-08-001	m	j	2008	500	-0.53	13.96	5.58	7.35	5.58		3.75	0.47	1.11	7.38	146	0	4	0	14	0	9	3	0	6	0	0	0	6	1013	2020	3033	1	0	1	0	1	0	1	1	0	1	0	0	0	1	1	1	1	1
LM-08-002	f	j	2008	464	-0.61	-20.72	5.58	7.35	5.58		3.75	0.47	1.11	7.38	336	0	0	0	4	1	34	0	0	0	0	0	0	4	562	1256.5	1818.5	1	0	0	0	1	1	1	0	0	0	0	0	0	1	0	0	1	1
LM-08-004	f	j	2008	479	-0.46	-8.25	5.58	7.35	5.58		3.75	0.47	1.11	7.38	5622	0	3	0	0	1	3	2	0	10	0	0	1	7	1152.5	2486.5	3639	1	0	1	0	0	1	1	1	0	1	0	0	1	1	1	1	1	1
LM-08-005	m	j	2008	452	-1.63	-15.94	5.58	7.35	5.58		3.75	0.47	1.11	7.38	0	0	0	0	0	28	0	0	0	29	3	0	1	4	0	2091.5	2091.5	0	0	0	0	0	1	0	0	0	1	1	0	1	0	0	1	1	0
LM-08-006	f	j	2008	438	-1.22	-36.67	5.58	7.35	5.58		3.75	0.47	1.11	7.38	5196	0	11	0	0	13	0	0	0	15	0	0	1	5	1198.5	1517.5	2716	1	0	1	0	0	1	0	0	0	1	0	0	1	1	1	1	1	1
LM-08-007	m	j	2008	530	1.27	14.49	5.58	7.35	5.58		3.75	0.47	1.11	7.38	906	0	0	0	10	0	0	0	0	0	1	0	0	3	607	744.5	1351.5	1	0	0	0	1	0	0	0	0	0	1	0	0	1	0	1	1	1
LM-08-008	m	j	2008	541	0.26	41.97	5.58	7.35	5.58		3.75	0.47	1.11	7.38	0	0	0	0	3	11	0	0	0	4	3	13	0	5	0	2146	2146	0	0	0	0	1	1	0	0	0	1	1	1	0	0	0	1	1	0
LM-08-010	f	j	2008	496	-0.54	10.07	5.58	7.35	5.58		3.75	0.47	1.11	7.38	1020	0	3	0	2	0	1	0	0	0	0	3	0	5	1135	1250.5	2385.5	1	0	1	0	1	0	1	0	0	0	0	1	0	1	1	1	1	1
LM-08-011	f	j	2008	424	-2.77	-25.37	5.58	7.35	5.58		3.75	0.47	1.11	7.38	696	0	10	0	24	32	10	3	0	8	0	0	1	8	1162	3184.5	4346.5	1	0	1	0	1	1	1	1	0	1	0	0	1	1	1	1	1	1
LM-08-012	f	j	2008	479	0.33	-21.12	5.58	7.35	5.58		3.75	0.47	1.11	7.38	20	0	0	0	1	10	0	0	0	3	0	0	1	5	284.5	1370.5	1655	1	0	0	0	1	1	0	0	0	1	0	0	1	1	0	1	1	1
LM-08-015	m	j	2008	501	1.24	-14.04	5.58	7.35	5.58		3.75	0.47	1.11	7.38	4	0	0	0	0	0	0	0	0	3	0	0	0	2	182	302	484	1	0	0	0	0	0	0	0	0	1	0	0	0	1	0	1	1	1
LM-08-017	m	j	2008	543	2.19	12.37	5.58	7.35	5.58		3.75	0.47	1.11	7.38	8	0	0	0	26	1	0	0	0	5	0	52	0	5	221.5	1933.5	2155	1	0	0	0	1	1	0	0	0	1	0	1	0	1	0	1	1	1
LM-08-018	m	j	2008	551	3.05	6.15	5.58	7.35	5.58		3.75	0.47	1.11	7.38	0	0	0	0	1	0	1	0	0	2	2	0	0	4	0	1312.5	1312.5	0	0	0	0	1	0	1	0	0	1	1	0	0	0	0	1	1	0
LM-08-022	f	j	2008	537	-1.2	61.99	5.58	7.35	5.58		3.75	0.47	1.11	7.38	328	0	46	0	7	12	0	0	0	2	0	0	4	6	1171	1709	2880	1	0	1	0	1	1	0	0	0	1	0	0	1	1	1	1	1	1
LM-08-024	m	j	2008	475	0.72	-31.48	5.58	7.35	5.58		3.75	0.47	1.11	7.38	218	0	0	0	1	0	0	0	0	7	0	0	1	4	522.5	1002	1524.5	1	0	0	0	1	0	0	0	0	1	0	0	1	1	0	1	1	1
LM-08-031	m	j	2008	486	-0.77	3.83	5.58	7.35	5.58		3.75	0.47	1.11	7.38	1528	0	0	0	11	0	0	0	0	6	9	1	1	6	619	2420.5	3039.5	1	0	0	0	1	0	0	0	0	1	1	1	1	1	0	1	1	1
LM-08-033	m	j	2008	560	3.54	7.11	5.58	7.35	5.58		3.75	0.47	1.11	7.38	2	0	0	0	10	40	9	5	0	13	8	0	0	7	154.5	3268	3422.5	1	0	0	0	1	1	1	1	0	1	1	0	0	1	0	1	1	1
LM-08-034	f	j	2008	521	-0.94	41.69	5.58	7.35	5.58		3.75	0.47	1.11	7.38	306	0	8	0	3	0	0	0	0	1	0	0	0	4	1110	401.5	1511.5	1	0	1	0	1	0	0	0	0	1	0	0	0	1	1	1	1	1
LM-08-042	f	j	2008	489	-0.16	-3.21	5.58	7.35	5.58		3.75	0.47	1.11	7.38	468	0	2	0	4	0	0	0	0	5	0	1	0	5	1080.5	1180.5	2261	1	0	1	0	1	0	0	0	0	1	0	1	0	1	1	1	1	1
LM-08-043	m	j	2008	450	1.05	-61.99	5.58	7.35	5.58		3.75	0.47	1.11	7.38	52	98	0	0	13	21	5	0	0	0	34	0	1	7	970	2609	3579	1	1	0	0	1	1	1	0	0	0	1	0	1	1	0	1	1	1
LM-08-044	f	j	2008	518	-0.33	28.72	5.58	7.35	5.58		3.75	0.47	1.11	7.38	58	0	14	0	16	9	14	2	0	11	0	0	0	7	958.5	2647	3605.5	1	0	1	0	1	1	1	1	0	1	0	0	0	1	1	1	1	1
LM-08-045	m	j	2008	509	0.8	1.08	5.58	7.35	5.58		3.75	0.47	1.11	7.38	216	0	0	0	1	1	24	2	0	2	0	0	0	6	519.5	1962	2481.5	1	0	0	0	1	1	1	1	0	1	0	0	0	1	0	1	1	1
LM-08-046	m	j	2008	527	2.11	-2.39	5.58	7.35	5.58		3.75	0.47	1.11	7.38	550	0	5	0	10	0	0	0	0	1	0	0	3	5	1128.5	1175	2303.5	1	0	1	0	1	0	0	0	0	1	0	0	1	1	1	1	1	1
LM-08-047	f	j	2008	444	-2.81	-4.66	5.58	7.35	5.58		3.75	0.47	1.11	7.38	0	0	0	0	2	0	0	0	0	8	0	0	0	2	0	623	623	0	0	0	0	1	0	0	0	0	1	0	0	0	0	0	1	1	0
LM-08-048	m	j	2008	504	1.81	-20.51	5.58	7.35	5.58		3.75	0.47	1.11	7.38	4	0	98	0	2	0	17	1	0	0	0	0	0	5	808	1315	2123	1	0	1	0	1	0	1	1	0	0	0	0	0	1	1	0	1	1
LM-08-050	m	j	2008	519	2.73	-20.5	5.58	7.35	5.58		3.75	0.47	1.11	7.38	2	0	1	0	3	5	3	0	0	1	0	0	3	7	621	2018.5	2639.5	1	0	1	0	1	1	1	0	0	1	0	0	1	1	1	1	1	1
LM-08-051	m	j	2008	512	0.49	9.24	5.58	7.35	5.58		3.75	0.47	1.11	7.38	0	0	0	0	9	0	27	4	0	5	0	0	0	4	0	1967.5	1967.5	0	0	0	0	1	0	1	1	0	1	0	0	0	0	0	1	1	0
LM-08-052	m	j	2008	525	0.65	19.66	5.58	7.35	5.58		3.75	0.47	1.11	7.38	64	0	0	0	2	0	9	1	0	3	0	0	0	5	390.5	1593.5	1984	1	0	0	0	1	0	1	1	0	1	0	0	0	1	0	1	1	1
LM-08-053	m	j	2008	516	0.96	5.52	5.58	7.35	5.58		3.75	0.47	1.11	7.38	0	0	0	0	0	0	0	0	0	2	0	0	0	1	0	256.5	256.5	0	0	0	0	0	0	0	0	0	1	0	0	0	0	0	1	0	0
LM-08-054	f	j	2008	476	-1.4	4.2	5.58	7.35	5.58		3.75	0.47	1.11	7.38	92	0	18	0	30	37	2	0	0	6	5	0	0	7	1017.5	2600	3617.5	1	0	1	0	1	1	1	0	0	1	1	0	0	1	1	1	1	1
LM-08-057	f	j	2008	487	-1.04	9.29	5.58	7.35	5.58		3.75	0.47	1.11	7.38	4	0	0	0	4	0	0	0	0	3	1	0	0	4	182	904	1086	1	0	0	0	1	0	0	0	0	1	1	0	0	1	0	1	1	1
LM-08-059	m	j	2008	535	1.29	19.07	5.58	7.35	5.58		3.75	0.47	1.11	7.38	0	0	0	0	2	0	0	0	0	4	0	0	0	2	0	503.5	503.5	0	0	0	0	1	0	0	0	0	1	0	0	0	0	0	1	1	0
LM-08-063	f	j	2008	522	1.33	5.49	5.58	7.35	5.58		3.75	0.47	1.11	7.38	0	0	0	0	4	1	3	1	0	6	0	0	1	6	0	2606	2606	0	0	0	0	1	1	1	1	0	1	0	0	1	0	0	1	1	0
LM-08-066	f	j	2008	426	-3.12	-17.52	5.58	7.35	5.58		3.75	0.47	1.11	7.38	312	0	0	0	7	1	0	0	0	1	15	0	2	6	555	2089.5	2644.5	1	0	0	0	1	1	0	0	0	1	1	0	1	1	0	1	1	1
LM-08-068	f	j	2008	472	-0.97	-6.89	5.58	7.35	5.58		3.75	0.47	1.11	7.38	132	0	0	0	3	1	0	0	0	0	0	3	1	5	466.5	1640	2106.5	1	0	0	0	1	1	0	0	0	0	0	1	1	1	0	1	1	1
LM-08-073	f	j	2008	483	-0.02	-11.46	5.58	7.35	5.58		3.75	0.47	1.11	7.38	80	0	1	0	4	126	0	0	0	0	1	0	1	6	883	1671.5	2554.5	1	0	1	0	1	1	0	0	0	0	1	0	1	1	1	1	1	1
LM-08-075	m	j	2008	474	-0.07	-19.64	5.58	7.35	5.58		3.75	0.47	1.11	7.38	2	0	0	0	6	4	0	0	0	10	8	3	2	7	154.5	2989	3143.5	1	0	0	0	1	1	0	0	0	1	1	1	1	1	0	1	1	1
LM-08-077	m	j	2008	548	2.66	9.55	5.58	7.35	5.58		3.75	0.47	1.11	7.38	0	0	2	0	5	92	0	0	0	12	5	0	2	6	502.5	2490.5	2993	0	0	1	0	1	1	0	0	0	1	1	0	1	0	1	1	1	1
LM-08-079	m	j	2008	484	1.43	-34.13	5.58	7.35	5.58		3.75	0.47	1.11	7.38	620	0	97	0	7	18	0	0	0	4	2	0	1	7	1217.5	2097	3314.5	1	0	1	0	1	1	0	0	0	1	1	0	1	1	1	1	1	1
LM-08-081	f	j	2008	518	-1.22	43.24	5.58	7.35	5.58		3.75	0.47	1.11	7.38	226	0	0	0	6	11	1	0	0	2	1	30	0	7	526	2555.5	3081.5	1	0	0	0	1	1	1	0	0	1	1	1	0	1	0	1	1	1
LM-08-082	m	j	2008	531	1.86	5.71	5.58	7.35	5.58		3.75	0.47	1.11	7.38	0	0	0	0	0	54	0	0	0	1	0	0	0	2	0	784.5	784.5	0	0	0	0	0	1	0	0	0	1	0	0	0	0	0	1	1	0
LM-08-083	f	j	2008	474	-2.45	19.44	5.58	7.35	5.58		3.75	0.47	1.11	7.38	100	0	0	0	3	1	0	0	0	4	1	6	0	6	440	1904	2344	1	0	0	0	1	1	0	0	0	1	1	1	0	1	0	1	1	1
LM-08-084	f	j	2008	454	-2.15	-5.54	5.58	7.35	5.58		3.75	0.47	1.11	7.38	64	0	50	0	10	5	3	2	0	0	4	0	2	8	1006	3067	4073	1	0	1	0	1	1	1	1	0	0	1	0	1	1	1	1	1	1
LM-08-087	f	j	2008	461	-1.91	-2.38	5.58	7.35	5.58		3.75	0.47	1.11	7.38	0	0	0	0	8	15	0	0	0	1	2	10	0	5	0	2113.5	2113.5	0	0	0	0	1	1	0	0	0	1	1	1	0	0	0	1	1	0
LM-08-095	m	j	2008	497	0.78	-10.6	5.58	7.35	5.58		3.75	0.47	1.11	7.38	0	0	0	0	1	3	0	0	0	0	0	0	1	3	0	1022	1022	0	0	0	0	1	1	0	0	0	0	0	0	1	0	0	0	1	0
LM-08-098	f	j	2008	505	-1.21	30.16	5.58	7.35	5.58		3.75	0.47	1.11	7.38	0	0	0	0	3	7	0	0	0	6	1	0	1	5	0	1915	1915	0	0	0	0	1	1	0	0	0	1	1	0	1	0	0	1	1	0
LM-08-099	f	j	2008	490	-2.61	38.13	5.58	7.35	5.58		3.75	0.47	1.11	7.38	380	0	0	0	1	0	17	3	0	3	1	0	1	7	570	2432	3002	1	0	0	0	1	0	1	1	0	1	1	0	1	1	0	1	1	1
LM-08-114	f	j	2008	528	1.57	7.45	5.58	7.35	5.58		3.75	0.47	1.11	7.38	6	0	0	0	12	0	0	0	0	42	2	1	0	5	202	2031.5	2233.5	1	0	0	0	1	0	0	0	0	1	1	1	0	1	0	1	1	1
LM-08-117	f	j	2008	507	-0.65	22.9	5.58	7.35	5.58		3.75	0.47	1.11	7.38	6	0	0	0	0	0	0	0	0	4	0	0	0	2	202	345	547	1	0	0	0	0	0	0	0	0	1	0	0	0	1	0	1	1	1
LM-08-118	m	j	2008	564	2.07	35.26	5.58	7.35	5.58		3.75	0.47	1.11	7.38	8	0	0	0	10	0	0	0	0	4	0	0	1	4	221.5	1181.5	1403	1	0	0	0	1	0	0	0	0	1	0	0	1	1	0	1	1	1
LM-08-120	m	j	2008	502	0.95	-8.32	5.58	7.35	5.58		3.75	0.47	1.11	7.38	104	0	0	0	7	9	0	0	0	1	1	0	0	5	445.5	1392.5	1838	1	0	0	0	1	1	0	0	0	1	1	0	0	1	0	1	1	1
LM-08-123	m	j	2008	569	0.75	61.87	5.58	7.35	5.58		3.75	0.47	1.11	7.38	28	0	0	0	4	89	0	0	0	3	3	0	0	5	310	1628.5	1938.5	1	0	0	0	1	1	0	0	0	1	1	0	0	1	0	1	1	1
LM-08-125	m	j	2008	521	0.12	24.26	5.58	7.35	5.58		3.75	0.47	1.11	7.38	0	0	0	0	3	1	0	0	1	32	0	0	0	4	0	1809.5	1809.5	0	0	0	0	1	1	0	0	1	1	0	0	0	0	0	1	1	0
LM-08-133	m	j	2008	487	-0.23	-3.98	5.58	7.35	5.58		3.75	0.47	1.11	7.38	0	0	0	0	32	43	0	0	0	28	4	0	1	5	0	2702	2702	0	0	0	0	1	1	0	0	0	1	1	0	1	0	0	1	1	0
LM-08-136	f	j	2008	471	-1.56	1.79	5.58	7.35	5.58		3.75	0.47	1.11	7.38	0	0	2	0	8	1	0	0	0	14	1	0	0	5	502.5	1650.5	2153	0	0	1	0	1	1	0	0	0	1	1	0	0	0	1	1	1	1
LM-08-137	f	j	2008	458	-1.75	-8.13	5.58	7.35	5.58		3.75	0.47	1.11	7.38	6	48	0	0	8	43	0	0	0	20	9	0	2	7	788.5	2654	3442.5	1	1	0	0	1	1	0	0	0	1	1	0	1	1	0	1	1	1
LM-08-140	f	j	2008	499	-0.85	18.24	5.58	7.35	5.58		3.75	0.47	1.11	7.38	154	0	3	0	18	2	1	0	0	0	21	0	0	6	1013.5	2040.5	3054	1	0	1	0	1	1	1	0	0	0	1	0	0	1	1	1	1	1
LM-09-001	f	j	2009	479.67	-1.74	13.45	7.35	7.35	5.58		4.03	1.08	0.44	6.64	474	0	0	0	5	0	0	0	0	0	1	0	1	4	580.5	1090.5	1671	1	0	0	0	1	0	0	0	0	0	1	0	1	1	0	1	1	1
LM-09-002	m	j	2009	519.98	-0.05	26.04	7.35	7.35	5.58		4.03	1.08	0.44	6.64	296	0	1	0	17	0	0	0	0	11	14	0	0	5	1012.5	1580	2592.5	1	0	1	0	1	0	0	0	0	1	1	0	0	1	1	1	1	1
LM-09-004	f	j	2009	483.03	-1.97	20.62	7.35	7.35	5.58		4.03	1.08	0.44	6.64	358	0	0	0	6	60	0	0	0	0	9	0	0	4	567	1483.5	2050.5	1	0	0	0	1	1	0	0	0	0	1	0	0	1	0	1	1	1
LM-09-005	f	j	2009	476.38	-3.13	32.96	7.35	7.35	5.58		4.03	1.08	0.44	6.64	0	0	0	0	20	0	0	0	0	5	0	0	1	3	0	1325	1325	0	0	0	0	1	0	0	0	0	1	0	0	1	0	0	1	1	0
LM-09-006	m	j	2009	549.67	1.84	24.68	7.35	7.35	5.58		4.03	1.08	0.44	6.64	330	0	0	0	11	1	12	3	0	4	0	0	0	6	560	2336	2896	1	0	0	0	1	1	1	1	0	1	0	0	0	1	0	1	1	1
LM-09-007	m	j	2009	540.71	0.4	39.45	7.35	7.35	5.58		4.03	1.08	0.44	6.64	42	0	0	0	15	0	18	1	0	2	1	0	0	6	352.5	2224.5	2577	1	0	0	0	1	0	1	1	0	1	1	0	0	1	0	1	1	1
LM-09-008	m	j	2009	506.24	0.55	2.51	7.35	7.35	5.58		4.03	1.08	0.44	6.64	166	36	0	1	4	21	0	0	0	2	0	0	0	6	1688.5	1034	2722.5	1	1	0	1	1	1	0	0	0	1	0	0	0	1	1	1	1	1
LM-09-009	m	j	2009	565.4	3.3	16.56	7.35	7.35	5.58		4.03	1.08	0.44	6.64	48	4	0	0	6	0	0	0	0	0	0	0	0	3	924.5	299.5	1224	1	1	0	0	1	0	0	0	0	0	0	0	0	1	0	0	1	1
LM-09-010	m	j	2009	524.13	1.75	0.75	7.35	7.35	5.58		4.03	1.08	0.44	6.64	222	0	0	0	59	0	0	0	0	38	6	0	2	5	524.5	2326.5	2851	1	0	0	0	1	0	0	0	0	1	1	0	1	1	0	1	1	1
LM-09-011	m	j	2009	521.94	1.76	-1.61	7.35	7.35	5.58		4.03	1.08	0.44	6.64	8	0	0	1	112	0	0	0	0	0	0	0	0	3	828.5	623	1451.5	1	0	0	1	1	0	0	0	0	0	0	0	0	1	1	0	1	1
LM-09-012	m	j	2009	507.41	0.83	-0.95	7.35	7.35	5.58		4.03	1.08	0.44	6.64	4	0	0	0	30	0	1	0	0	0	0	0	0	3	182	1049.5	1231.5	1	0	0	0	1	0	1	0	0	0	0	0	0	1	0	0	1	1
LM-09-013	m	j	2009	514.48	-0.02	20.05	7.35	7.35	5.58		4.03	1.08	0.44	6.64	78	0	0	0	4	0	0	0	0	5	6	0	1	5	411.5	1633	2044.5	1	0	0	0	1	0	0	0	0	1	1	0	1	1	0	1	1	1
LM-09-014	f	j	2009	471.19	-3.28	30.25	7.35	7.35	5.58		4.03	1.08	0.44	6.64	62	0	0	0	4	0	0	0	0	3	6	0	3	5	386.5	1693	2079.5	1	0	0	0	1	0	0	0	0	1	1	0	1	1	0	1	1	1
LM-09-015	m	j	2009	534.91	0.05	39.35	7.35	7.35	5.58		4.03	1.08	0.44	6.64	0	0	2	0	5	35	0	0	0	4	3	0	1	6	502.5	2126	2628.5	0	0	1	0	1	1	0	0	0	1	1	0	1	0	1	1	1	1
LM-09-016	f	j	2009	462.8	-3.5	25.44	7.35	7.35	5.58		4.03	1.08	0.44	6.64	12	0	3	0	5	23	0	0	0	0	0	0	4	6	1400	1429	2829	1	0	1	0	1	1	0	0	0	0	0	0	1	1	1	0	1	1
LM-09-017	f	j	2009	494.25	-1.88	30.36	7.35	7.35	5.58		4.03	1.08	0.44	6.64	4	0	0	0	1	19	0	0	0	9	4	0	0	5	182	1643	1825	1	0	0	0	1	1	0	0	0	1	1	0	0	1	0	1	1	1
LM-09-018	m	j	2009	510.82	1.04	-0.92	7.35	7.35	5.58		4.03	1.08	0.44	6.64	0	0	0	0	8	54	0	0	0	7	4	0	0	4	0	1889.5	1889.5	0	0	0	0	1	1	0	0	0	1	1	0	0	0	0	1	1	0
LM-09-034	f	j	2009	452.14	-3.74	18.78	7.35	7.35	5.58		4.03	1.08	0.44	6.64	80	126	0	0	32	0	28	2	0	5	1	0	0	7	1016	2497	3513	1	1	0	0	1	0	1	1	0	1	1	0	0	1	0	1	1	1
LM-09-042	m	j	2009	596.21	1.49	76.99	7.35	7.35	5.58		4.03	1.08	0.44	6.64	0	0	0	0	14	1	4	1	1	4	2	29	0	8	0	3960.5	3960.5	0	0	0	0	1	1	1	1	1	1	1	1	0	0	0	1	1	0
LM-09-043	f	j	2009	488.97	-1.88	25.05	7.35	7.35	5.58		4.03	1.08	0.44	6.64	58	0	0	0	17	3	16	1	0	15	1	0	0	7	378.5	2984	3362.5	1	0	0	0	1	1	1	1	0	1	1	0	0	1	0	1	1	1
LM-09-045	f	j	2009	482.96	-1.66	15.36	7.35	7.35	5.58		4.03	1.08	0.44	6.64	34	0	1	0	126	0	26	7	0	16	20	0	2	8	795.5	3591	4386.5	1	0	1	0	1	0	1	1	0	1	1	0	1	1	1	1	1	1
LM-09-046	m	j	2009	539.5	0.81	31.39	7.35	7.35	5.58		4.03	1.08	0.44	6.64	70	242	0	0	4	0	0	1	0	1	0	1	0	6	1006.5	1561	2567.5	1	1	0	0	1	0	0	1	0	1	0	1	0	1	0	1	1	1
LM-09-047	f	j	2009	460.14	-1.94	-2.72	7.35	7.35	5.58		4.03	1.08	0.44	6.64	260	0	0	0	6	0	0	0	0	2	1	0	1	5	532	1374	1906	1	0	0	0	1	0	0	0	0	1	1	0	1	1	0	1	1	1
LM-09-048	m	j	2009	512.8	0.48	10.14	7.35	7.35	5.58		4.03	1.08	0.44	6.64	50	0	0	0	51	1	1	0	0	12	15	0	0	6	368.5	2630.5	2999	1	0	0	0	1	1	1	0	0	1	1	0	0	1	0	1	1	1
LM-09-049	f	j	2009	454.84	-3.47	17.06	7.35	7.35	5.58		4.03	1.08	0.44	6.64	2	0	0	0	44	346	0	0	0	18	19	1	1	7	154.5	3413.5	3568	1	0	0	0	1	1	0	0	0	1	1	1	1	1	0	1	1	1
LM-09-050	m	j	2009	540.64	1.67	18.48	7.35	7.35	5.58		4.03	1.08	0.44	6.64	1	0	0	0	4	0	1	2	0	2	4	0	0	6	141.5	2111	2252.5	1	0	0	0	1	0	1	1	0	1	1	0	0	1	0	1	1	1
LM-09-051	f	j	2009	415.68	-1.48	-54.81	7.35	7.35	5.58		4.03	1.08	0.44	6.64	0	0	0	0	39	17	0	0	0	5	1	0	1	5	0	2292	2292	0	0	0	0	1	1	0	0	0	1	1	0	1	0	0	1	1	0
LM-09-052	m	j	2009	541.75	0.13	44.8	7.35	7.35	5.58		4.03	1.08	0.44	6.64	6	0	0	0	21	6	0	0	0	16	19	0	2	6	202	2711	2913	1	0	0	0	1	1	0	0	0	1	1	0	1	1	0	1	1	1
LM-09-053	m	j	2009	513.86	1.6	-7.2	7.35	7.35	5.58		4.03	1.08	0.44	6.64	0	0	0	0	1	24	0	0	0	7	0	0	0	3	0	1092.5	1092.5	0	0	0	0	1	1	0	0	0	1	0	0	0	0	0	1	1	0
LM-09-054	f	j	2009	523.81	-0.85	43.05	7.35	7.35	5.58		4.03	1.08	0.44	6.64	156	0	0	0	24	0	1	0	0	0	0	0	0	3	491.5	1024.5	1516	1	0	0	0	1	0	1	0	0	0	0	0	0	1	0	0	1	1
LM-09-055	f	j	2009	561.39	-0.26	70.97	7.35	7.35	5.58		4.03	1.08	0.44	6.64	46	0	0	0	19	2	0	0	0	6	1	3	1	7	362.5	2731.5	3094	1	0	0	0	1	1	0	0	0	1	1	1	1	1	0	1	1	1
LM-09-058	f	j	2009	512.6	-2.27	55.04	7.35	7.35	5.58		4.03	1.08	0.44	6.64	792	0	0	0	2	1	0	0	0	7	1	0	0	5	601	1359.5	1960.5	1	0	0	0	1	1	0	0	0	1	1	0	0	1	0	1	1	1
LM-09-071	f	j	2009	491.29	-1.89	27.51	7.35	7.35	5.58		4.03	1.08	0.44	6.64	74	0	0	0	17	136	1	0	0	11	1	0	0	6	406	2460.5	2866.5	1	0	0	0	1	1	1	0	0	1	1	0	0	1	0	1	1	1
LM-09-072	m	j	2009	552.66	-0.72	69.77	7.35	7.35	5.58		4.03	1.08	0.44	6.64	28	0	0	0	16	1	0	0	0	7	0	1	0	5	310	1856	2166	1	0	0	0	1	1	0	0	0	1	0	1	0	1	0	1	1	1
LM-09-073	m	j	2009	522.08	0.94	11.88	7.35	7.35	5.58		4.03	1.08	0.44	6.64	0	0	0	2	3	76	0	0	0	4	4	0	0	5	615	1660.5	2275.5	0	0	0	1	1	1	0	0	0	1	1	0	0	0	1	1	1	1
LM-09-084	m	j	2009	533.65	0.25	34.79	7.35	7.35	5.58		4.03	1.08	0.44	6.64	8	0	0	0	5	8	0	0	0	3	8	0	0	5	221.5	1656.5	1878	1	0	0	0	1	1	0	0	0	1	1	0	0	1	0	1	1	1
LM-09-085	f	j	2009	474.89	-1.28	1.17	7.35	7.35	5.58		4.03	1.08	0.44	6.64	190	0	28	0	47	0	0	0	0	7	4	0	2	6	1111	2097	3208	1	0	1	0	1	0	0	0	0	1	1	0	1	1	1	1	1	1
LM-09-087	f	j	2009	480.24	-2.27	22.68	7.35	7.35	5.58		4.03	1.08	0.44	6.64	0	0	0	0	50	2	10	0	0	4	1	0	0	5	0	2319.5	2319.5	0	0	0	0	1	1	1	0	0	1	1	0	0	0	0	1	1	0
LM-09-089	m	j	2009	540.74	0.01	45.79	7.35	7.93	7.35		4.03	1.08	0.44	6.64	82	0	2	0	7	0	1	0	0	10	2	0	0	6	923.5	1770	2693.5	1	0	1	0	1	0	1	0	0	1	1	0	0	1	1	1	1	1
LM-09-090	m	j	2009	491.26	0.14	-5.84	7.35	7.93	7.35		4.03	1.08	0.44	6.64	20	0	0	0	11	18	1	0	1	1	2	0	0	7	284.5	2685.5	2970	1	0	0	0	1	1	1	0	1	1	1	0	0	1	0	1	1	1
LM-09-092	f	j	2009	442.59	-2.45	-11.9	7.35	7.93	7.35		4.03	1.08	0.44	6.64	0	0	13	0	17	4	32	1	0	2	3	1	0	8	575.5	3410.5	3986	0	0	1	0	1	1	1	1	0	1	1	1	0	0	1	1	1	1
LM-09-093	m	j	2009	499.91	-0.25	9.32	7.35	7.93	7.35		4.03	1.08	0.44	6.64	72	0	0	0	1	0	25	0	0	0	2	0	0	4	401	1159.5	1560.5	1	0	0	0	1	0	1	0	0	0	1	0	0	1	0	1	1	1
LM-09-099	m	j	2009	543.8	1.94	17.18	7.35	7.93	7.35		4.03	1.08	0.44	6.64	298	0	0	0	6	0	0	0	0	5	7	54	1	6	547	2336	2883	1	0	0	0	1	0	0	0	0	1	1	1	1	1	0	1	1	1
LM-09-102	f	j	2009	451.45	-1.98	-10.76	7.35	7.93	7.35		4.03	1.08	0.44	6.64	2	2	0	0	25	1	2	0	0	2	0	0	0	6	703	1716.5	2419.5	1	1	0	0	1	1	1	0	0	1	0	0	0	1	0	1	1	1
LM-09-104	f	j	2009	537.59	0.08	41.59	7.35	7.93	7.35		4.03	1.08	0.44	6.64	80	0	0	1	19	0	5	1	0	2	0	0	0	6	1023.5	1859.5	2883	1	0	0	1	1	0	1	1	0	1	0	0	0	1	1	1	1	1
LM-09-106	m	j	2009	515.49	1.5	-3.92	7.35	7.93	7.35		4.03	1.08	0.44	6.64	0	0	0	0	10	15	0	0	0	8	2	0	1	5	0	2261.5	2261.5	0	0	0	0	1	1	0	0	0	1	1	0	1	0	0	1	1	0
LM-09-107	m	j	2009	513.23	-0.13	20.67	7.35	7.93	7.35		4.03	1.08	0.44	6.64	66	0	0	0	5	1	0	0	0	4	1	0	2	6	392.5	1931.5	2324	1	0	0	0	1	1	0	0	0	1	1	0	1	1	0	1	1	1
LM-09-128	f	j	2009	488.59	-0.43	0.93	7.35	7.93	7.35		4.03	1.08	0.44	6.64	138	0	0	0	7	29	0	0	0	5	0	0	0	4	471	1261.5	1732.5	1	0	0	0	1	1	0	0	0	1	0	0	0	1	0	1	1	1
LM-09-134	f	j	2009	445.63	-2.1	-14.69	7.35	7.93	7.35		4.03	1.08	0.44	6.64	150	0	0	0	6	0	0	0	0	11	7	29	1	6	486	2459.5	2945.5	1	0	0	0	1	0	0	0	0	1	1	1	1	1	0	1	1	1
LM-09-137	f	j	2009	417.19	-2.95	-29.15	7.35	7.93	7.35		4.03	1.08	0.44	6.64	1540	0	0	0	7	0	19	1	0	1	7	1	0	7	620	2826	3446	1	0	0	0	1	0	1	1	0	1	1	1	0	1	0	1	1	1
LM-09-138	f	j	2009	485.8	-1.24	11.44	7.35	7.93	7.35		4.03	1.08	0.44	6.64	0	0	0	0	4	5	0	0	0	4	2	0	0	4	0	1502.5	1502.5	0	0	0	0	1	1	0	0	0	1	1	0	0	0	0	1	1	0
LM-09-139	f	j	2009	482.85	-0.5	-3.75	7.35	7.93	7.35		4.03	1.08	0.44	6.64	110	0	0	0	6	75	1	0	0	0	0	0	3	5	451	1992	2443	1	0	0	0	1	1	1	0	0	0	0	0	1	1	0	0	1	1
LM-09-140	f	j	2009	490.28	-1.29	16.66	7.35	7.93	7.35		4.03	1.08	0.44	6.64	0	0	0	0	12	9	34	4	0	14	11	1	0	7	0	3852	3852	0	0	0	0	1	1	1	1	0	1	1	1	0	0	0	1	1	0
LM-09-142	m	j	2009	514.4	0.58	10.07	7.35	7.93	7.35		4.03	1.08	0.44	6.64	10	0	1	1	34	32	1	0	0	8	3	0	0	8	1311.5	2576	3887.5	1	0	1	1	1	1	1	0	0	1	1	0	0	1	1	1	1	1
LM-09-143	m	j	2009	556.61	1.12	43.41	7.35	7.93	7.35		4.03	1.08	0.44	6.64	0	0	0	0	10	0	0	0	0	4	1	0	2	4	0	1641	1641	0	0	0	0	1	0	0	0	0	1	1	0	1	0	0	1	1	0
LM-09-144	f	j	2009	558.91	0.48	56.24	7.35	7.93	7.35		4.03	1.08	0.44	6.64	2	0	0	0	9	102	4	0	0	3	3	0	0	6	154.5	2313.5	2468	1	0	0	0	1	1	1	0	0	1	1	0	0	1	0	1	1	1
LM-09-146	m	j	2009	550.24	2.17	19.84	7.35	7.93	7.35		4.03	1.08	0.44	6.64	712	0	0	0	4	0	0	0	0	4	0	9	0	4	595	1185	1780	1	0	0	0	1	0	0	0	0	1	0	1	0	1	0	1	1	1
LM-09-147	m	j	2009	541.88	2.6	4.41	7.35	7.93	7.35		4.03	1.08	0.44	6.64	108	0	6	0	3	4	5	1	0	2	1	0	0	8	997	2410.5	3407.5	1	0	1	0	1	1	1	1	0	1	1	0	0	1	1	1	1	1
LM-09-154	f	j	2009	444.17	-3.48	6.43	7.35	7.93	7.35		4.03	1.08	0.44	6.64	738	0	32	0	130	1	39	1	0	0	1	0	0	7	1201.5	2568.5	3770	1	0	1	0	1	1	1	1	0	0	1	0	0	1	1	1	1	1
LM-10-001	m	j	2010	397.57	-2.86	-50.26	7.93	7.93	7.35		5.4	1.4	1	6.46	152	0	0	0	7	1	0	0	0	10	6	0	2	6	487.5	2333.5	2821	1	0	0	0	1	1	0	0	0	1	1	0	1	1	0	1	1	1
LM-10-005	m	j	2010	503.83	1.95	-22.88	7.93	7.93	7.35		5.4	1.4	1	6.46	39	0	0	7	7	15	0	0	0	4	5	0	0	6	970	1734.5	2704.5	1	0	0	1	1	1	0	0	0	1	1	0	0	1	1	1	1	1
LM-10-011	m	j	2010	511.94	0.81	3.85	7.93	7.93	7.35		5.4	1.4	1	6.46	249	20	0	0	1	0	0	0	0	4	0	0	0	4	1107	453.5	1560.5	1	1	0	0	1	0	0	0	0	1	0	0	0	1	0	1	1	1
LM-10-012	f	j	2010	427.98	-2.67	-22.94	7.93	7.93	7.35		5.4	1.4	1	6.46	854	177	0	0	0	0	0	0	0	1	0	0	1	4	1211.5	656.5	1868	1	1	0	0	0	0	0	0	0	1	0	0	1	1	0	1	1	1
LM-10-018	f	j	2010	470.15	-1.74	4.02	7.93	7.93	7.35		5.4	1.4	1	6.46	5	0	0	0	7	1	58	7	0	1	0	0	0	6	191.5	2179	2370.5	1	0	0	0	1	1	1	1	0	1	0	0	0	1	0	1	1	1
LM-10-023	m	j	2010	534.97	2.33	1.97	7.93	7.93	7.35		5.4	1.4	1	6.46	188	0	0	0	6	0	1	0	0	0	0	0	0	3	509	806	1315	1	0	0	0	1	0	1	0	0	0	0	0	0	1	0	0	1	1
LM-10-024	m	j	2010	519.27	2.26	-12.57	7.93	7.93	7.35		5.4	1.4	1	6.46	78	212	0	0	2	0	0	0	0	4	1	0	0	5	1019.5	866.5	1886	1	1	0	0	1	0	0	0	0	1	1	0	0	1	0	1	1	1
LM-10-027	f	j	2010	458.51	-1.91	-4.94	7.93	7.93	7.35		5.4	1.4	1	6.46	147	0	0	0	2	0	0	0	0	5	1	0	1	5	481	1355.5	1836.5	1	0	0	0	1	0	0	0	0	1	1	0	1	1	0	1	1	1
LM-10-031	f	j	2010	451.13	-1.64	-16.67	7.93	7.93	7.35		5.4	1.4	1	6.46	472	0	0	0	1	0	0	0	0	11	2	0	1	5	579	1514.5	2093.5	1	0	0	0	1	0	0	0	0	1	1	0	1	1	0	1	1	1
LM-10-034	f	j	2010	382.07	-3.23	-59.62	7.93	7.93	7.35		5.4	1.4	1	6.46	8	0	3	0	4	39	0	0	0	4	5	0	2	7	745	2252.5	2997.5	1	0	1	0	1	1	0	0	0	1	1	0	1	1	1	1	1	1
LM-10-038	m	j	2010	498.06	1.11	-14.82	7.93	7.93	7.35		5.4	1.4	1	6.46	413	0	0	0	51	278	13	6	0	14	8	1	0	8	574	4122.5	4696.5	1	0	0	0	1	1	1	1	0	1	1	1	0	1	0	1	1	1
LM-10-048	m	j	2010	486.73	-0.72	3.79	7.93	7.93	7.35		5.4	1.4	1	6.46	84	0	0	0	1	6	0	0	0	6	1	0	1	6	423	1818	2241	1	0	0	0	1	1	0	0	0	1	1	0	1	1	0	1	1	1
LM-10-049	m	j	2010	476.73	1.56	-43.56	7.93	7.93	7.35		5.4	1.4	1	6.46	148	0	0	0	6	0	0	0	0	16	0	0	0	3	482.5	854.5	1337	1	0	0	0	1	0	0	0	0	1	0	0	0	1	0	1	1	1
LM-10-053	f	j	2010	450.89	-2.1	-9.4	7.93	7.93	7.35		5.4	1.4	1	6.46	6	0	2	0	0	0	0	0	0	1	2	0	0	4	704.5	642.5	1347	1	0	1	0	0	0	0	0	0	1	1	0	0	1	1	1	1	1
LM-10-054	f	j	2010	486.14	0.72	-20.47	7.93	7.93	7.35		5.4	1.4	1	6.46	175	0	0	0	3	1	1	0	0	0	0	16	0	5	501.5	1717	2218.5	1	0	0	0	1	1	1	0	0	0	0	1	0	1	0	1	1	1
LM-10-055	m	j	2010	543.76	3.47	-7.83	7.93	7.93	7.35		5.4	1.4	1	6.46	34	0	16	0	0	39	0	0	0	0	0	0	2	4	913.5	1125.5	2039	1	0	1	0	0	1	0	0	0	0	0	0	1	1	1	0	1	1
LM-10-058	m	j	2010	493.25	-0.03	-0.95	7.93	7.93	7.35		5.4	1.4	1	6.46	61	0	4	0	2	1	0	0	0	0	1	0	0	5	918	921	1839	1	0	1	0	1	1	0	0	0	0	1	0	0	1	1	1	1	1
LM-10-059	f	j	2010	434.89	-2.24	-23.05	7.93	7.93	7.35		5.4	1.4	1	6.46	316	0	38	1	3	0	0	0	0	1	4	0	0	6	1770.5	921.5	2692	1	0	1	1	1	0	0	0	0	1	1	0	0	1	1	1	1	1
LM-10-065	f	j	2010	412	-1.98	-50.33	7.93	7.93	7.35		5.4	1.4	1	6.46	20	0	0	0	10	2	0	0	0	4	0	2	0	5	284.5	1743	2027.5	1	0	0	0	1	1	0	0	0	1	0	1	0	1	0	1	1	1
LM-10-067	f	j	2010	429.26	-1.49	-40.98	7.93	7.93	7.35		5.4	1.4	1	6.46	311	0	0	0	10	29	0	0	0	14	0	0	1	5	554	1932	2486	1	0	0	0	1	1	0	0	0	1	0	0	1	1	0	1	1	1
LM-10-068	m	j	2010	547.12	2.23	15.87	7.93	7.93	7.35		5.4	1.4	1	6.46	149	0	2	0	23	27	0	0	0	3	0	0	2	6	987	1914	2901	1	0	1	0	1	1	0	0	0	1	0	0	1	1	1	1	1	1
LM-10-071	f	j	2010	461	-1.57	-8.02	7.93	7.93	7.35		5.4	1.4	1	6.46	1	0	2	0	8	38	0	0	0	16	3	0	0	6	644	1960.5	2604.5	1	0	1	0	1	1	0	0	0	1	1	0	0	1	1	1	1	1
LM-10-074	f	j	2010	401.04	-3.01	-44.35	7.93	7.93	7.35		5.4	1.4	1	6.46	14	0	0	0	11	0	0	0	0	4	6	0	0	4	260.5	1305	1565.5	1	0	0	0	1	0	0	0	0	1	1	0	0	1	0	1	1	1
LM-10-075	m	j	2010	512.04	0.69	6	7.93	7.93	7.35		5.4	1.4	1	6.46	0	0	5	0	3	0	0	0	0	2	0	14	0	4	541.5	1065.5	1607	0	0	1	0	1	0	0	0	0	1	0	1	0	0	1	1	1	1
LM-10-079	m	j	2010	465.63	-0.1	-27.47	7.93	7.93	7.35		5.4	1.4	1	6.46	301	589	6	0	5	0	0	0	0	7	1	0	0	6	1716.5	1074	2790.5	1	1	1	0	1	0	0	0	0	1	1	0	0	1	1	1	1	1
LM-10-091	m	j	2010	475.94	-0.49	-10.76	7.93	7.93	7.35		5.4	1.4	1	6.46	844	134	1	0	4	3	0	1	0	3	0	0	0	7	1671.5	1557.5	3229	1	1	1	0	1	1	0	1	0	1	0	0	0	1	1	1	1	1
LM-10-093	m	j	2010	540.42	1.79	16.24	7.93	7.93	7.35		5.4	1.4	1	6.46	388	0	7	0	10	0	0	0	0	17	1	7	0	6	1124.5	1906	3030.5	1	0	1	0	1	0	0	0	0	1	1	1	0	1	1	1	1	1
LM-10-094	f	j	2010	440.13	-3.47	2.22	7.93	7.93	7.35		5.4	1.4	1	6.46	94	0	20	0	24	2	27	2	0	26	7	1	0	9	1023	3890	4913	1	0	1	0	1	1	1	1	0	1	1	1	0	1	1	1	1	1
LM-10-097	m	j	2010	491.1	0.42	-10.56	7.93	7.93	7.35		5.4	1.4	1	6.46	23	2	1	0	7	0	0	0	0	7	0	0	1	6	1315	1220.5	2535.5	1	1	1	0	1	0	0	0	0	1	0	0	1	1	1	1	1	1
LM-10-100	m	j	2010	496.71	0.81	-11.32	7.93	7.93	7.35		5.4	1.4	1	6.46	158	81	9	0	2	0	0	0	0	13	0	0	1	6	1651.5	1143.5	2795	1	1	1	0	1	0	0	0	0	1	0	0	1	1	1	1	1	1
LM-10-102	f	j	2010	465.1	-0.89	-15.02	7.93	7.93	7.35		5.4	1.4	1	6.46	36	0	1	0	5	0	0	1	0	13	4	0	0	6	802	1880.5	2682.5	1	0	1	0	1	0	0	1	0	1	1	0	0	1	1	1	1	1
LM-10-107	f	j	2010	470.26	-0.64	-13.99	7.93	7.93	7.35		5.4	1.4	1	6.46	1428	0	0	0	2	0	0	1	0	5	0	26	0	6	617	2342	2959	1	0	0	0	1	0	0	1	0	1	0	1	0	1	0	1	1	1
LM-10-122	m	j	2010	486.63	0.29	-12.95	7.93	7.93	7.35		5.4	1.4	1	6.46	378	0	50	0	20	0	7	2	0	0	0	2	0	6	1184.5	2226.5	3411	1	0	1	0	1	0	1	1	0	0	0	1	0	1	1	1	1	1
LM-10-134	m	j	2010	468.19	-0.93	-11.33	7.93	7.93	7.35		5.4	1.4	1	6.46	76	0	1	0	0	0	0	0	0	0	0	0	3	4	1497	592	2089	1	0	1	0	0	0	0	0	0	0	0	0	1	1	1	0	1	1
LM-10-137	f	j	2010	503.2	-2.43	48.32	7.93	7.93	7.35		5.4	1.4	1	6.46	1572	0	0	0	8	0	2	0	0	6	0	0	0	4	621	1291.5	1912.5	1	0	0	0	1	0	1	0	0	1	0	0	0	1	0	1	1	1
LM-10-191	f	j	2010	489.23	-2.16	29.88	7.93	7.93	7.35		5.4	1.4	1	6.46	134	0	73	0	21	0	0	0	0	8	17	0	1	6	1088.5	2034.5	3123	1	0	1	0	1	0	0	0	0	1	1	0	1	1	1	1	1	1
LM-10-199	f	j	2010	439.95	-1.98	-22.38	7.93	7.93	7.35		5.4	1.4	1	6.46	98	41	0	0	3	0	0	0	0	4	0	0	0	4	1023.5	545	1568.5	1	1	0	0	1	0	0	0	0	1	0	0	0	1	0	1	1	1
LM-10-202	m	j	2010	472	0.21	-26.12	7.93	7.93	7.35		5.4	1.4	1	6.46	134	0	3	0	1	7	0	0	0	7	1	0	1	7	992	1855	2847	1	0	1	0	1	1	0	0	0	1	1	0	1	1	1	1	1	1
LM-10-204	m	j	2010	517.95	1.17	4	7.93	7.93	7.35		5.4	1.4	1	6.46	0	0	0	0	9	0	0	0	0	10	0	0	0	2	0	857.5	857.5	0	0	0	0	1	0	0	0	0	1	0	0	0	0	0	1	1	0
LM-10-211	f	j	2010	440	-1	-38.31	7.93	7.93	7.35		5.4	1.4	1	6.46	0	0	0	0	25	11	0	0	0	1	0	0	1	4	0	1688.5	1688.5	0	0	0	0	1	1	0	0	0	1	0	0	1	0	0	1	1	0
LM-10-215	f	j	2010	435	-2.13	-24.79	7.93	7.93	7.35		5.4	1.4	1	6.46	101	0	0	0	1	2	0	0	0	5	1	0	0	5	441.5	1289.5	1731	1	0	0	0	1	1	0	0	0	1	1	0	0	1	0	1	1	1
LM-10-220	f	j	2010	392.93	-3.41	-45.87	7.93	7.93	7.35		5.4	1.4	1	6.46	2	0	0	0	17	54	0	0	0	1	3	1	0	6	154.5	2294.5	2449	1	0	0	0	1	1	0	0	0	1	1	1	0	1	0	1	1	1
LM-10-223	m	j	2010	504.21	1.34	-12.53	7.93	7.93	7.35		5.4	1.4	1	6.46	586	0	0	0	9	0	0	0	0	6	2	0	0	4	590	1210	1800	1	0	0	0	1	0	0	0	0	1	1	0	0	1	0	1	1	1
LM-10-226	f	j	2010	479.93	1.34	-36.85	7.93	7.93	7.35		5.4	1.4	1	6.46	146	235	0	0	4	0	0	0	0	6	2	0	0	5	1088.5	1087	2175.5	1	1	0	0	1	0	0	0	0	1	1	0	0	1	0	1	1	1
LM-10-229	f	j	2010	465.58	-1.81	0.57	7.93	7.93	7.35		5.4	1.4	1	6.46	3	0	6	0	0	0	0	0	0	6	0	0	0	3	717.5	407	1124.5	1	0	1	0	0	0	0	0	0	1	0	0	0	1	1	1	1	1
LM-10-241	m	j	2010	501	3.53	-51.57	7.93	7.93	7.35		5.4	1.4	1	6.46	43	0	0	0	9	28	0	0	0	4	7	2	1	7	356	2865.5	3221.5	1	0	0	0	1	1	0	0	0	1	1	1	1	1	0	1	1	1
LM-10-251	f	j	2010	472.51	-0.95	-6.73	7.93	7.93	7.35		5.4	1.4	1	6.46	122	0	0	0	1	0	0	0	0	0	0	0	0	3	1081.5	108.5	1190	1	0	0	0	1	0	0	0	0	0	0	0	0	1	1	0	1	1
LM-10-257	f	j	2010	463.08	-1.69	-3.88	7.93	7.93	7.35		5.4	1.4	1	6.46	70	0	63	0	49	2	34	16	0	7	2	11	0	9	1015.5	3762	4777.5	1	0	1	0	1	1	1	1	0	1	1	1	0	1	1	1	1	1
LM-10-259	m	j	2010	490.58	1.89	-35.23	7.93	7.93	7.35		5.4	1.4	1	6.46	43	0	0	0	4	1	1	1	0	0	0	0	0	5	356	1703	2059	1	0	0	0	1	1	1	1	0	0	0	0	0	1	0	0	1	1
LM-10-268	m	j	2010	533.67	1.81	9.29	7.93	7.93	7.35		5.4	1.4	1	6.46	57	375	143	0	4	2	0	0	0	8	4	1	0	8	1621	2225	3846	1	1	1	0	1	1	0	0	0	1	1	1	0	1	1	1	1	1
LM-10-270	m	j	2010	500.55	1.28	-15.25	7.93	7.93	7.35		5.4	1.4	1	6.46	181	0	15	0	1	2	0	0	0	11	0	9	0	6	1087.5	1658.5	2746	1	0	1	0	1	1	0	0	0	1	0	1	0	1	1	1	1	1
LM-10-287	m	j	2010	491.8	0.42	-9.88	7.93	7.93	7.35		5.4	1.4	1	6.46	130	0	9	0	10	0	0	0	0	20	2	0	1	6	1028.5	1858	2886.5	1	0	1	0	1	0	0	0	0	1	1	0	1	1	1	1	1	1
LM-10-288	f	j	2010	458.91	-1.02	-19.15	7.93	7.93	7.35		5.4	1.4	1	6.46	103	0	0	0	5	0	0	0	0	3	2	0	0	4	444	1015.5	1459.5	1	0	0	0	1	0	0	0	0	1	1	0	0	1	0	1	1	1
LM-10-289	f	j	2010	469.85	0.17	-27.62	7.93	7.93	7.35		5.4	1.4	1	6.46	111	0	0	0	0	7	0	0	0	2	1	0	4	5	452	1722.5	2174.5	1	0	0	0	0	1	0	0	0	1	1	0	1	1	0	1	1	1
LM-10-304	f	j	2010	477.35	-0.58	-7.82	7.93	7.93	7.35		5.4	1.4	1	6.46	23	0	0	0	6	0	0	0	0	9	1	0	0	4	300	1143.5	1443.5	1	0	0	0	1	0	0	0	0	1	1	0	0	1	0	1	1	1
LM-10-306	f	j	2010	489.68	-1.16	13.96	7.93	7.93	7.35		5.4	1.4	1	6.46	0	0	0	0	20	5	0	0	0	25	3	0	0	4	0	2046.5	2046.5	0	0	0	0	1	1	0	0	0	1	1	0	0	0	0	1	1	0
LM-10-310	m	j	2010	491.08	0.23	-7.47	7.93	7.93	7.35		5.4	1.4	1	6.46	1	0	0	0	6	0	0	1	0	6	0	1	0	5	141.5	1827	1968.5	1	0	0	0	1	0	0	1	0	1	0	1	0	1	0	1	1	1
LM-10-324	f	j	2010	429.93	-1.45	-41.08	7.93	7.93	7.35		5.4	1.4	1	6.46	76	0	0	0	1	0	0	0	0	5	0	0	1	4	408.5	942.5	1351	1	0	0	0	1	0	0	0	0	1	0	0	1	1	0	1	1	1
LM-10-326	m	j	2010	509.21	0.78	1.73	7.93	7.93	7.35		5.4	1.4	1	6.46	5	59	25	0	3	28	0	0	0	0	0	0	0	6	1999	751.5	2750.5	1	1	1	0	1	1	0	0	0	0	0	0	0	1	1	0	1	1
LM-10-327	m	j	2010	484.47	0.76	-22.76	7.93	7.93	7.35		5.4	1.4	1	6.46	0	0	0	0	10	8	0	0	0	13	4	0	0	4	0	1926.5	1926.5	0	0	0	0	1	1	0	0	0	1	1	0	0	0	0	1	1	0
LM-11-001	m	j	2011	492.35	-0.08	-1.08	4.28	7.93	7.35		2.3	0.92	0.89	4.83	186	0	37	0	0	0	0	1	0	3	1	0	2	6	1113	1774.5	2887.5	1	0	1	0	0	0	0	1	0	1	1	0	1	1	1	1	1	1
LM-11-002	m	j	2011	480.99	-0.47	-6.08	4.28	7.93	7.35		2.3	0.92	0.89	4.83	50	12290	0	0	3	0	0	0	0	7	2	17	1	7	998.5	2147.5	3146	1	1	0	0	1	0	0	0	0	1	1	1	1	1	0	1	1	1
LM-11-004	f	j	2011	479.84	-1.37	7.52	4.28	7.93	7.35		2.3	0.92	0.89	4.83	5	0	0	0	20	12	0	0	0	10	3	0	8	6	191.5	2613.5	2805	1	0	0	0	1	1	0	0	0	1	1	0	1	1	0	1	1	1
LM-11-012	f	j	2011	405.45	-3.46	-32.49	4.28	7.93	7.35		2.3	0.92	0.89	4.83	35	0	146	0	10	32	0	0	0	41	19	0	0	6	962	2174.5	3136.5	1	0	1	0	1	1	0	0	0	1	1	0	0	1	1	1	1	1
LM-11-013	m	j	2011	467.96	-0.85	-12.83	4.28	7.93	7.35		2.3	0.92	0.89	4.83	13	0	0	0	3	5	0	0	0	1	1	20	2	7	256.5	2408	2664.5	1	0	0	0	1	1	0	0	0	1	1	1	1	1	0	1	1	1
LM-11-014	f	j	2011	389.12	-3.85	-42.41	4.28	7.93	7.35		2.3	0.92	0.89	4.83	79	0	0	0	44	0	0	0	0	36	0	1	0	4	414	1749	2163	1	0	0	0	1	0	0	0	0	1	0	1	0	1	0	1	1	1
LM-11-022	m	j	2011	520.36	0.58	16.18	4.28	7.93	7.35		2.3	0.92	0.89	4.83	17	0	27	0	4	0	0	0	0	3	1	0	1	6	871.5	1359	2230.5	1	0	1	0	1	0	0	0	0	1	1	0	1	1	1	1	1	1
LM-11-025	m	j	2011	486.83	-1.34	14.03	4.28	7.93	7.35		2.3	0.92	0.89	4.83	267	0	0	0	0	0	0	1	0	9	1	2	0	5	535	1979.5	2514.5	1	0	0	0	0	0	0	1	0	1	1	1	0	1	0	1	1	1
LM-11-030	f	j	2011	410.29	-3.35	-29.52	4.28	7.93	7.35		2.3	0.92	0.89	4.83	58	0	0	0	5	0	0	0	0	20	6	0	0	4	378.5	1413	1791.5	1	0	0	0	1	0	0	0	0	1	1	0	0	1	0	1	1	1
LM-11-035	f	j	2011	419.95	-1.58	-48.85	4.28	7.93	7.35		2.3	0.92	0.89	4.83	431	0	9	0	12	0	0	0	0	6	33	0	1	6	1140	1903	3043	1	0	1	0	1	0	0	0	0	1	1	0	1	1	1	1	1	1
LM-11-038	m	j	2011	438.92	0.26	-60.02	4.28	7.93	7.35		2.3	0.92	0.89	4.83	19	0	0	0	26	0	0	1	0	8	1	0	3	6	280	2505.5	2785.5	1	0	0	0	1	0	0	1	0	1	1	0	1	1	0	1	1	1
LM-11-039	m	j	2011	473.86	-1.33	0.96	4.28	7.93	7.35		2.3	0.92	0.89	4.83	138	0	55	0	21	0	0	0	0	19	0	0	3	5	1088	1669	2757	1	0	1	0	1	0	0	0	0	1	0	0	1	1	1	1	1	1
LM-11-040	m	j	2011	507.96	1.75	-15.55	4.28	7.93	7.35		2.3	0.92	0.89	4.83	217	0	1	0	40	26	0	0	0	96	21	2	4	8	987.5	3562.5	4550	1	0	1	0	1	1	0	0	0	1	1	1	1	1	1	1	1	1
LM-11-042	f	j	2011	445.36	-1.95	-17.43	4.28	7.93	7.35		2.3	0.92	0.89	4.83	33	0	0	0	29	0	0	0	0	0	0	0	2	3	326	1090	1416	1	0	0	0	1	0	0	0	0	0	0	0	1	1	0	0	1	1
LM-11-043	f	j	2011	447.12	-3.2	4.88	4.28	7.93	7.35		2.3	0.92	0.89	4.83	310	0	0	0	14	0	0	0	0	0	1	0	3	4	553	1388	1941	1	0	0	0	1	0	0	0	0	0	1	0	1	1	0	1	1	1
LM-11-083	f	j	2011	501.57	-1.84	37.01	4.28	7.93	7.35		2.3	0.92	0.89	4.83	8	0	0	0	12	33	1	0	0	15	1	0	10	7	221.5	3025	3246.5	1	0	0	0	1	1	1	0	0	1	1	0	1	1	0	1	1	1
LM-11-084	f	j	2011	484	-1.19	8.84	4.28	7.93	7.35		2.3	0.92	0.89	4.83	42	0	0	0	7	1	5	1	0	0	0	0	0	5	352.5	1847.5	2200	1	0	0	0	1	1	1	1	0	0	0	0	0	1	0	0	1	1
LM-11-086	f	j	2011	422.28	-3.22	-19.73	4.28	7.93	7.35		2.3	0.92	0.89	4.83	30	0	0	0	32	13	0	0	0	77	7	0	0	5	317	2266	2583	1	0	0	0	1	1	0	0	0	1	1	0	0	1	0	1	1	1
LM-11-089	f	j	2011	439.89	-2.06	-21.08	4.28	7.93	7.35		2.3	0.92	0.89	4.83	46	0	0	0	0	5	1	0	0	0	0	0	0	3	362.5	984	1346.5	1	0	0	0	0	1	1	0	0	0	0	0	0	1	0	0	1	1
LM-11-091	f	j	2011	467.98	-0.24	-22.81	4.28	7.93	7.35		2.3	0.92	0.89	4.83	59	280	0	0	9	0	0	0	0	82	6	0	1	6	995.5	2004	2999.5	1	1	0	0	1	0	0	0	0	1	1	0	1	1	0	1	1	1
LM-11-092	f	j	2011	462.91	-0.4	-25.33	4.28	4.28	7.93		2.3	0.92	0.89	4.83	21	0	0	0	5	0	0	0	0	72	7	2	1	6	289.5	2502.5	2792	1	0	0	0	1	0	0	0	0	1	1	1	1	1	0	1	1	1
LM-11-093	m	j	2011	444.66	-0.23	-46.4	4.28	4.28	7.93		2.3	0.92	0.89	4.83	28	48	95	0	3	0	0	0	0	18	5	84	0	7	1519.5	1943	3462.5	1	1	1	0	1	0	0	0	0	1	1	1	0	1	1	1	1	1
LM-11-094	m	j	2011	522.34	2.26	-9.47	4.28	4.28	7.93		2.3	0.92	0.89	4.83	30	2	0	0	1	0	0	0	0	80	1	0	0	5	865.5	1096.5	1962	1	1	0	0	1	0	0	0	0	1	1	0	0	1	0	1	1	1
LM-11-097	m	j	2011	523.41	1.71	0.6	4.28	4.28	7.93		2.3	0.92	0.89	4.83	1310	0	0	0	1	0	0	0	0	1	0	0	0	3	616	310	926	1	0	0	0	1	0	0	0	0	1	0	0	0	1	0	1	1	1
LM-11-100	f	j	2011	445	-0.96	-34.09	4.28	4.28	7.93		2.3	0.92	0.89	4.83	97	0	0	0	1	0	0	0	0	28	18	0	0	4	437	1321	1758	1	0	0	0	1	0	0	0	0	1	1	0	0	1	0	1	1	1
LM-11-103	m	j	2011	535.29	2.33	2.38	4.28	4.28	7.93		2.3	0.92	0.89	4.83	0	0	0	1	0	3	0	1	0	7	1	0	2	6	607	2369.5	2976.5	0	0	0	1	0	1	0	1	0	1	1	0	1	0	1	1	1	1
LM-11-112	f	j	2011	429	-3.19	-13.44	4.28	4.28	7.93		2.3	0.92	0.89	4.83	2	0	0	0	1	26	2	4	0	1	8	0	3	8	154.5	3187	3341.5	1	0	0	0	1	1	1	1	0	1	1	0	1	1	0	1	1	1
LM-11-115	m	j	2011	498.32	0.63	-6.7	4.28	4.28	7.93		2.3	0.92	0.89	4.83	958	0	0	0	0	0	0	0	0	0	0	0	1	2	610	455	1065	1	0	0	0	0	0	0	0	0	0	0	0	1	1	0	0	1	1
LM-11-116	m	j	2011	480.25	-0.66	-3.65	4.28	4.28	7.93		2.3	0.92	0.89	4.83	39	0	111	0	10	0	0	0	0	18	5	0	2	6	971	2046	3017	1	0	1	0	1	0	0	0	0	1	1	0	1	1	1	1	1	1
LM-11-119	f	j	2011	476.23	-1.56	7.01	4.28	4.28	7.93		2.3	0.92	0.89	4.83	187	0	0	0	3	0	0	0	0	68	90	0	0	4	508	1451	1959	1	0	0	0	1	0	0	0	0	1	1	0	0	1	0	1	1	1
LM-11-124	m	j	2011	494.01	-0.41	6	4.28	4.28	7.93		2.3	0.92	0.89	4.83	49	0	0	0	1	0	0	0	0	58	4	1	0	5	366	1810	2176	1	0	0	0	1	0	0	0	0	1	1	1	0	1	0	1	1	1
LM-11-127	m	j	2011	519	0.19	21.1	4.28	4.28	7.93		2.3	0.92	0.89	4.83	89	0	1	0	3	72	0	0	0	13	36	0	1	7	895.5	2407	3302.5	1	0	1	0	1	1	0	0	0	1	1	0	1	1	1	1	1	1
LM-11-128	f	j	2011	455.46	-1.33	-17.52	4.28	4.28	7.93		2.3	0.92	0.89	4.83	17	0	0	0	11	0	0	0	0	49	1	0	3	5	272	1971	2243	1	0	0	0	1	0	0	0	0	1	1	0	1	1	0	1	1	1
LM-11-134	f	j	2011	447.15	-2.42	-7.97	4.28	4.28	7.93		2.3	0.92	0.89	4.83	3	0	0	0	7	0	0	0	0	4	3	0	0	4	170	1157.5	1327.5	1	0	0	0	1	0	0	0	0	1	1	0	0	1	0	1	1	1
LM-11-137	m	j	2011	529.95	1.71	7.22	4.28	4.28	7.93		2.3	0.92	0.89	4.83	25	0	0	0	3	0	0	0	0	10	3	20	6	6	304	2420.5	2724.5	1	0	0	0	1	0	0	0	0	1	1	1	1	1	0	1	1	1
LM-11-138	m	j	2011	510.49	1.95	-16.23	4.28	4.28	7.93		2.3	0.92	0.89	4.83	80	0	0	0	9	1	16	10	0	21	0	0	1	7	416.5	3025.5	3442	1	0	0	0	1	1	1	1	0	1	0	0	1	1	0	1	1	1
LM-11-140	m	j	2011	460	-0.97	-18.78	4.28	4.28	7.93		2.3	0.92	0.89	4.83	588	0	4	0	4	1	0	0	0	22	0	0	0	5	1124.5	1227	2351.5	1	0	1	0	1	1	0	0	0	1	0	0	0	1	1	1	1	1
LM-11-142	m	j	2011	485	1.21	-29.57	4.28	4.28	7.93		2.3	0.92	0.89	4.83	32	0	2	0	1	9	0	0	0	5	9	0	0	6	826.5	1584.5	2411	1	0	1	0	1	1	0	0	0	1	1	0	0	1	1	1	1	1
LM-11-143	f	j	2011	477.55	-1.9	13.89	4.28	4.28	7.93		2.3	0.92	0.89	4.83	13	0	0	0	2	0	0	0	0	9	9	26	1	6	256.5	2307.5	2564	1	0	0	0	1	0	0	0	0	1	1	1	1	1	0	1	1	1
LM-11-152	f	j	2011	455.19	-1.82	-9.66	4.28	4.28	7.93		2.3	0.92	0.89	4.83	73	0	0	0	56	12	11	1	0	48	0	0	0	6	403.5	2869.5	3273	1	0	0	0	1	1	1	1	0	1	0	0	0	1	0	1	1	1
LM-11-153	m	j	2011	479	0.96	-31.52	4.28	4.28	7.93		2.3	0.92	0.89	4.83	2	7	0	0	40	55	0	0	0	23	4	5	0	7	720.5	2863	3583.5	1	1	0	0	1	1	0	0	0	1	1	1	0	1	0	1	1	1
LM-11-161	f	j	2011	464.53	-2.36	8.51	4.28	4.28	7.93		2.3	0.92	0.89	4.83	40	0	1	0	0	0	0	0	0	3	1	0	0	4	814	665	1479	1	0	1	0	0	0	0	0	0	1	1	0	0	1	1	1	1	1
LM-11-162	m	j	2011	486.28	-0.66	2.36	4.28	4.28	7.93		2.3	0.92	0.89	4.83	0	0	0	0	4	23	0	0	0	0	2	0	2	4	0	1775	1775	0	0	0	0	1	1	0	0	0	0	1	0	1	0	0	1	1	0
LM-11-163	m	j	2011	518.25	2.29	-14.07	4.28	4.28	7.93		2.3	0.92	0.89	4.83	141	452	2	0	26	22	0	0	0	32	25	3	0	8	1597	2882	4479	1	1	1	0	1	1	0	0	0	1	1	1	0	1	1	1	1	1
LM-11-172	f	j	2011	428.94	-3.06	-15.6	4.28	4.28	7.93		2.3	0.92	0.89	4.83	9	0	2	0	12	9	0	0	0	19	16	27	2	8	733.5	3273	4006.5	1	0	1	0	1	1	0	0	0	1	1	1	1	1	1	1	1	1
LM-11-181	m	j	2011	499.95	1.2	-14.47	4.28	4.28	7.93		2.3	0.92	0.89	4.83	7	0	0	0	4	0	0	0	0	18	12	12	1	6	211.5	2474.5	2686	1	0	0	0	1	0	0	0	0	1	1	1	1	1	0	1	1	1
LM-11-189	m	j	2011	481.94	-0.46	-5.31	4.28	4.28	7.93		2.3	0.92	0.89	4.83	176	0	0	0	0	0	0	0	0	0	5	0	1	3	503	998	1501	1	0	0	0	0	0	0	0	0	0	1	0	1	1	0	1	1	1
LM-11-200	m	j	2011	498.46	0.1	2	4.28	4.28	7.93		2.3	0.92	0.89	4.83	29	0	0	0	0	0	0	0	0	6	1	46	0	4	313	1395	1708	1	0	0	0	0	0	0	0	0	1	1	1	0	1	0	1	1	1
LM-11-201	f	j	2011	455.75	-3	10.18	4.28	4.28	7.93		2.3	0.92	0.89	4.83	59	0	0	0	0	0	0	0	0	6	4	3	1	5	381.5	1967.5	2349	1	0	0	0	0	0	0	0	0	1	1	1	1	1	0	1	1	1
LM-11-204	f	j	2011	495.15	-0.95	15.92	4.28	4.28	7.93		2.3	0.92	0.89	4.83	7	0	0	0	0	0	0	0	0	2	0	0	1	3	211.5	711.5	923	1	0	0	0	0	0	0	0	0	1	0	0	1	1	0	1	1	1
LM-11-205	f	j	2011	413.71	-3.77	-19.21	4.28	4.28	7.93		2.3	0.92	0.89	4.83	2	0	0	0	0	0	0	0	0	8	1	0	1	4	154.5	1282.5	1437	1	0	0	0	0	0	0	0	0	1	1	0	1	1	0	1	1	1
LM-11-206	f	j	2011	466.36	-0.95	-12.8	4.28	4.28	7.93		2.3	0.92	0.89	4.83	4	0	0	0	0	0	0	0	0	65	7	0	0	3	182	1194.5	1376.5	1	0	0	0	0	0	0	0	0	1	1	0	0	1	0	1	1	1
LM-11-213	f	j	2011	481.88	-1.6	13.42	4.28	4.28	7.93		2.3	0.92	0.89	4.83	218	0	0	0	0	0	0	0	0	5	0	0	2	3	522.5	930.5	1453	1	0	0	0	0	0	0	0	0	1	0	0	1	1	0	1	1	1
LM-11-221	f	j	2011	431.25	0.14	-65.87	4.28	4.28	7.93		2.3	0.92	0.89	4.83	208	0	1	0	0	0	0	0	0	0	4	0	1	4	980.5	975	1955.5	1	0	1	0	0	0	0	0	0	0	1	0	1	1	1	1	1	1
LM-11-255	f	j	2011	479	-1.93	15.93	4.28	4.28	7.93		2.3	0.92	0.89	4.83	44	3	2	0	2	0	0	0	0	53	6	0	1	7	1418.5	1791.5	3210	1	1	1	0	1	0	0	0	0	1	1	0	1	1	1	1	1	1
LM-11-256	f	j	2011	509.71	-1.84	45.12	4.28	4.28	7.93		2.3	0.92	0.89	4.83	98	0	0	0	2	0	0	0	0	3	0	0	4	4	438.5	1073.5	1512	1	0	0	0	1	0	0	0	0	1	0	0	1	1	0	1	1	1
LM-11-257	m	j	2011	515.28	2.67	-23.22	4.28	4.28	7.93		2.3	0.92	0.89	4.83	4	4	0	0	4	0	0	0	0	12	1	0	1	6	742	1577	2319	1	1	0	0	1	0	0	0	0	1	1	0	1	1	0	1	1	1
LM-11-258	m	j	2011	518	1.02	6.53	4.28	4.28	7.93		2.3	0.92	0.89	4.83	0	0	0	0	10	3	0	0	0	81	3	0	4	5	0	2564.5	2564.5	0	0	0	0	1	1	0	0	0	1	1	0	1	0	0	1	1	0
LM-11-259	m	j	2011	500.51	-0.01	5.98	4.28	4.28	7.93		2.3	0.92	0.89	4.83	0	0	0	0	2	17	0	0	0	13	2	0	1	5	0	2109.5	2109.5	0	0	0	0	1	1	0	0	0	1	1	0	1	0	0	1	1	0
LM-11-265	m	j	2011	492	2.27	-40.04	4.28	4.28	7.93		2.3	0.92	0.89	4.83	41	4	47	0	1	0	0	0	0	4	5	43	0	7	1523.5	1620.5	3144	1	1	1	0	1	0	0	0	0	1	1	1	0	1	1	1	1	1
LM-12-001	f	j	2012	387.21	-1.22	-87.48	3.53	4.28	7.93		1.73	0.84	0.84	7.89	43	0	0	0	6	0	0	0	0	19	0	0	0	3	356	875	1231	1	0	0	0	1	0	0	0	0	1	0	0	0	1	0	1	1	1
LM-12-002	f	j	2012	455.67	-1.52	-14.2	3.53	4.28	7.93		1.73	0.84	0.84	7.89	85	0	0	0	6	0	0	0	0	3	4	0	1	6	1050.5	1576.5	2627	1	0	0	0	1	0	0	0	0	1	1	0	1	1	1	1	1	1
LM-12-003	f	j	2012	451.98	-2.03	-9.4	3.53	4.28	7.93		1.73	0.84	0.84	7.89	156	0	0	0	1	0	0	0	0	1	0	0	1	4	491.5	765	1256.5	1	0	0	0	1	0	0	0	0	1	0	0	1	1	0	1	1	1
LM-12-004	f	j	2012	445.68	-0.38	-42.86	3.53	4.28	7.93		1.73	0.84	0.84	7.89	71	0	0	0	14	0	0	0	0	26	3	1	0	5	399	2075.5	2474.5	1	0	0	0	1	0	0	0	0	1	1	1	0	1	0	1	1	1
LM-12-005	m	j	2012	544	3.68	-11.14	3.53	4.28	7.93		1.73	0.84	0.84	7.89	173	0	0	0	30	0	21	4	0	2	1	0	0	6	500	2381	2881	1	0	0	0	1	0	1	1	0	1	1	0	0	1	0	1	1	1
LM-12-008	f	j	2012	473.2	-1.25	-1.08	3.53	4.28	7.93		1.73	0.84	0.84	7.89	386	0	2	0	24	0	0	0	0	16	0	0	0	4	1073.5	1073	2146.5	1	0	1	0	1	0	0	0	0	1	0	0	0	1	1	1	1	1
LM-12-009	m	j	2012	489	0.87	-20.07	3.53	4.28	7.93		1.73	0.84	0.84	7.89	92	0	0	0	18	61	0	0	0	10	3	0	0	5	431.5	2042.5	2474	1	0	0	0	1	1	0	0	0	1	1	0	0	1	0	1	1	1
LM-12-010	f	j	2012	451.17	-1.63	-16.8	3.53	4.28	7.93		1.73	0.84	0.84	7.89	2	0	0	0	12	0	0	0	0	9	1	0	0	4	154.5	1258	1412.5	1	0	0	0	1	0	0	0	0	1	1	0	0	1	0	1	1	1
LM-12-011	m	j	2012	489	-0.19	-2.57	3.53	4.28	7.93		1.73	0.84	0.84	7.89	339	0	0	0	0	0	0	0	0	0	0	0	0	1	563	0	563	1	0	0	0	0	0	0	0	0	0	0	0	0	1	0	0	1	1
LM-12-018	f	j	2012	469.66	0.93	-40.39	3.53	4.28	7.93		1.73	0.84	0.84	7.89	8	0	7	0	18	0	0	0	0	6	5	0	1	6	774	1877.5	2651.5	1	0	1	0	1	0	0	0	0	1	1	0	1	1	1	1	1	1
LM-12-020	m	j	2012	469.9	0.33	-30.34	3.53	4.28	7.93		1.73	0.84	0.84	7.89	0	0	0	0	5	0	0	0	0	4	1	0	0	3	0	980.5	980.5	0	0	0	0	1	0	0	0	0	1	1	0	0	0	0	1	1	0
LM-12-021	f	j	2012	427.93	-2.48	-26.1	3.53	4.28	7.93		1.73	0.84	0.84	7.89	0	0	3	0	7	0	1	0	0	7	2	0	0	5	523.5	1713	2236.5	0	0	1	0	1	0	1	0	0	1	1	0	0	0	1	1	1	1
LM-12-022	f	j	2012	469.16	-0.76	-13.19	3.53	4.28	7.93		1.73	0.84	0.84	7.89	101	0	0	0	14	86	0	0	0	7	2	0	1	6	441.5	2368.5	2810	1	0	0	0	1	1	0	0	0	1	1	0	1	1	0	1	1	1
LM-12-023	m	j	2012	489.04	2.57	-47.84	3.53	4.28	7.93		1.73	0.84	0.84	7.89	4	0	0	0	2	8	0	0	0	17	0	0	0	4	182	1216.5	1398.5	1	0	0	0	1	1	0	0	0	1	0	0	0	1	0	1	1	1
LM-12-025	m	j	2012	466.7	0.21	-31.48	3.53	4.28	7.93		1.73	0.84	0.84	7.89	0	0	0	0	13	1	3	0	0	0	5	0	2	5	0	2466	2466	0	0	0	0	1	1	1	0	0	0	1	0	1	0	0	1	1	0
LM-12-029	m	j	2012	481.76	1.5	-37.67	3.53	4.28	7.93		1.73	0.84	0.84	7.89	0	0	1	0	28	92	0	0	0	6	1	0	2	6	466.5	2459	2925.5	0	0	1	0	1	1	0	0	0	1	1	0	1	0	1	1	1	1
LM-12-030	m	j	2012	518.39	2.57	-18.44	3.53	4.28	7.93		1.73	0.84	0.84	7.89	36	0	8	0	11	0	0	0	0	29	0	0	1	5	894	1454.5	2348.5	1	0	1	0	1	0	0	0	0	1	0	0	1	1	1	1	1	1
LM-12-031	f	j	2012	484	-0.79	2.14	3.53	4.28	7.93		1.73	0.84	0.84	7.89	0	0	0	0	38	21	0	0	0	7	0	0	0	3	0	1543.5	1543.5	0	0	0	0	1	1	0	0	0	1	0	0	0	0	0	1	1	0
LM-12-032	f	j	2012	497.87	-1.21	23.01	3.53	4.28	7.93		1.73	0.84	0.84	7.89	0	0	0	0	15	0	0	0	0	16	1	0	1	4	0	1819	1819	0	0	0	0	1	0	0	0	0	1	1	0	1	0	0	1	1	0
LM-12-042	m	j	2012	553.9	1.33	37.27	3.53	4.28	7.93		1.73	0.84	0.84	7.89	17	0	0	0	4	7	0	0	0	0	0	0	0	3	272	729	1001	1	0	0	0	1	1	0	0	0	0	0	0	0	1	0	0	1	1
LM-12-043	f	j	2012	477.25	-1.21	2.43	3.53	4.28	7.93		1.73	0.84	0.84	7.89	0	0	0	0	46	0	0	0	0	4	0	0	1	3	0	1384.5	1384.5	0	0	0	0	1	0	0	0	0	1	0	0	1	0	0	1	1	0
LM-12-045	m	j	2012	479.59	-1.02	1.53	3.53	4.28	7.93		1.73	0.84	0.84	7.89	0	0	15	0	45	0	0	0	0	15	1	0	4	5	582.5	2105.5	2688	0	0	1	0	1	0	0	0	0	1	1	0	1	0	1	1	1	1
LM-12-048	m	j	2012	560.67	2.18	30.17	3.53	4.28	7.93		1.73	0.84	0.84	7.89	0	0	0	0	15	0	0	0	0	8	0	0	0	2	0	910.5	910.5	0	0	0	0	1	0	0	0	0	1	0	0	0	0	0	1	1	0
LM-12-050	f	j	2012	474.16	0.42	-27.53	3.53	4.28	7.93		1.73	0.84	0.84	7.89	94	0	20	0	3	2	1	0	0	1	1	0	0	7	1023	1710	2733	1	0	1	0	1	1	1	0	0	1	1	0	0	1	1	1	1	1
LM-12-051	m	j	2012	500.4	0.45	-1.65	3.53	4.28	7.93		1.73	0.84	0.84	7.89	0	0	0	0	3	0	0	0	0	18	7	0	0	3	0	1344.5	1344.5	0	0	0	0	1	0	0	0	0	1	1	0	0	0	0	1	1	0
LM-12-053	f	j	2012	415.31	-2.59	-36.94	3.53	4.28	7.93		1.73	0.84	0.84	7.89	3	0	0	0	156	0	15	0	0	18	8	0	0	5	170	2380.5	2550.5	1	0	0	0	1	0	1	0	0	1	1	0	0	1	0	1	1	1
LM-12-054	m	j	2012	535.9	2.09	6.86	3.53	4.28	7.93		1.73	0.84	0.84	7.89	66	0	0	0	24	2	1	0	0	1	2	0	2	7	392.5	2657.5	3050	1	0	0	0	1	1	1	0	0	1	1	0	1	1	0	1	1	1
LM-12-055	f	j	2012	458.31	-0.93	-21.16	3.53	4.28	7.93		1.73	0.84	0.84	7.89	5	0	0	0	44	6	0	0	0	0	4	13	0	5	191.5	2191.5	2383	1	0	0	0	1	1	0	0	0	0	1	1	0	1	0	1	1	1
LM-12-056	m	j	2012	502	0.87	-6.99	3.53	4.28	7.93		1.73	0.84	0.84	7.89	0	0	13	0	30	790	0	3	0	4	11	0	7	7	575.5	3351.5	3927	0	0	1	0	1	1	0	1	0	1	1	0	1	0	1	1	1	1
LM-12-057	m	j	2012	529.76	2.21	-1.23	3.53	4.28	7.93		1.73	0.84	0.84	7.89	0	0	0	0	5	1028	5	2	0	0	1	0	0	5	0	2417.5	2417.5	0	0	0	0	1	1	1	1	0	0	1	0	0	0	0	1	1	0
LM-12-059	m	j	2012	549.15	2.37	15.47	3.53	4.28	7.93		1.73	0.84	0.84	7.89	140	0	0	0	42	0	50	6	0	8	1	0	0	6	473.5	2649.5	3123	1	0	0	0	1	0	1	1	0	1	1	0	0	1	0	1	1	1
LM-12-061	m	j	2012	550.71	2.18	20.22	3.53	4.28	7.93		1.73	0.84	0.84	7.89	0	0	0	0	50	273	0	0	0	1	7	0	1	5	0	2449.5	2449.5	0	0	0	0	1	1	0	0	0	1	1	0	1	0	0	1	1	0
LM-12-062	m	j	2012	544.14	1.2	29.68	3.53	4.28	7.93		1.73	0.84	0.84	7.89	93	0	3	0	31	57	0	0	0	0	6	0	0	5	956.5	1694	2650.5	1	0	1	0	1	1	0	0	0	0	1	0	0	1	1	1	1	1
LM-12-064	m	j	2012	521.27	0.84	12.72	3.53	4.28	7.93		1.73	0.84	0.84	7.89	11	0	2	0	87	31	0	0	0	35	0	0	0	5	746.5	1784	2530.5	1	0	1	0	1	1	0	0	0	1	0	0	0	1	1	1	1	1
LM-12-066	f	j	2012	493.62	-1.98	31.41	3.53	4.28	7.93		1.73	0.84	0.84	7.89	2	0	0	0	57	71	0	0	0	38	6	0	3	6	154.5	2957	3111.5	1	0	0	0	1	1	0	0	0	1	1	0	1	1	0	1	1	1
LM-12-070	f	j	2012	461.95	-3.32	21.68	3.53	4.28	7.93		1.73	0.84	0.84	7.89	828	0	0	0	23	0	0	0	0	16	0	0	0	3	603	1066.5	1669.5	1	0	0	0	1	0	0	0	0	1	0	0	0	1	0	1	1	1
LM-12-079	f	j	2012	516.49	-0.37	27.88	3.53	4.28	7.93		1.73	0.84	0.84	7.89	0	0	14	0	15	139	0	0	0	1	0	0	1	5	580	1722.5	2302.5	0	0	1	0	1	1	0	0	0	1	0	0	1	0	1	1	1	1
LM-12-082	m	j	2012	497.28	-0.04	3.13	3.53	4.28	7.93		1.73	0.84	0.84	7.89	0	0	0	0	5	0	0	0	0	4	6	0	0	3	0	1177.5	1177.5	0	0	0	0	1	0	0	0	0	1	1	0	0	0	0	1	1	0
LM-12-083	f	j	2012	459.36	-0.73	-23.47	3.53	4.28	7.93		1.73	0.84	0.84	7.89	13	2	0	0	21	1	23	4	0	0	1	0	0	7	805	2484.5	3289.5	1	1	0	0	1	1	1	1	0	0	1	0	0	1	0	1	1	1
LM-12-086	m	j	2012	519.57	2.65	-18.67	3.53	4.28	7.93		1.73	0.84	0.84	7.89	0	0	21	0	2	81	0	0	1	0	0	1	0	6	1212.5	1926.5	3139	0	0	1	0	1	1	0	0	1	0	0	1	0	0	1	1	1	1
LM-12-087	f	j	2012	516.43	0.15	19.26	3.53	4.28	7.93		1.73	0.84	0.84	7.89	38	0	0	0	32	108	3	1	1	2	0	0	3	8	341	3724.5	4065.5	1	0	0	0	1	1	1	1	1	1	0	0	1	1	0	1	1	1
LM-12-088	f	j	2012	481.27	-0.53	-4.84	3.53	4.28	7.93		1.73	0.84	0.84	7.89	12	0	0	0	41	2	0	0	0	4	5	0	1	6	249.5	2357	2606.5	1	0	0	0	1	1	0	0	0	1	1	0	1	1	0	1	1	1
LM-12-091	f	j	2012	463	-1.39	-8.97	3.53	4.28	7.93		1.73	0.84	0.84	7.89	0	0	0	0	56	1	0	0	0	2	15	0	1	5	0	2322	2322	0	0	0	0	1	1	0	0	0	1	1	0	1	0	0	1	1	0
LM-12-105	f	j	2012	484.68	-1.17	9.08	3.53	4.28	7.93		1.73	0.84	0.84	7.89	18	1	0	0	66	235	0	0	0	10	3	0	1	7	816	2670	3486	1	1	0	0	1	1	0	0	0	1	1	0	1	1	0	1	1	1
LM-12-106	m	j	2012	537.96	1.62	16.67	3.53	4.28	7.93		1.73	0.84	0.84	7.89	0	126	27	0	18	208	0	0	1	3	2	49	0	8	1199	3072	4271	0	1	1	0	1	1	0	0	1	1	1	1	0	1	1	1	1	1
LM-12-131	m	j	2012	407.3	-3.51	-29.9	3.53	4.28	7.93		1.73	0.84	0.84	7.89	274	0	0	0	19	0	0	0	0	10	1	0	0	4	539.5	1340.5	1880	1	0	0	0	1	0	0	0	0	1	1	0	0	1	0	1	1	1
LM-12-132	m	j	2012	516.04	1.47	-2.87	3.53	4.28	7.93		1.73	0.84	0.84	7.89	48	0	0	0	6	2	0	0	0	6	1	0	0	5	364.5	1508.5	1873	1	0	0	0	1	1	0	0	0	1	1	0	0	1	0	1	1	1
LM-12-134	m	j	2012	479.35	-0.44	-8.23	3.53	4.28	7.93		1.73	0.84	0.84	7.89	37	0	0	0	37	33	0	0	0	7	0	0	0	4	338	1567	1905	1	0	0	0	1	1	0	0	0	1	0	0	0	1	0	1	1	1
LM-12-163	m	j	2012	506	0.56	1.99	3.53	4.28	7.93		1.73	0.84	0.84	7.89	13	0	0	0	25	0	0	0	0	3	8	6	0	5	256.5	2009.5	2266	1	0	0	0	1	0	0	0	0	1	1	1	0	1	0	1	1	1
LM-12-170	f	j	2012	440.36	-2.1	-20.03	3.53	4.28	7.93		1.73	0.84	0.84	7.89	0	0	0	0	12	96	0	0	0	25	27	0	0	4	0	2238.5	2238.5	0	0	0	0	1	1	0	0	0	1	1	0	0	0	0	1	1	0
LM-12-171	m	j	2012	529.83	2.92	-12.82	3.53	4.28	7.93		1.73	0.84	0.84	7.89	0	0	0	0	19	131	0	0	0	11	1	0	1	5	0	2426.5	2426.5	0	0	0	0	1	1	0	0	0	1	1	0	1	0	0	1	1	0
LM-12-193	f	j	2012	499.43	-1.09	22.62	3.53	4.28	7.93		1.73	0.84	0.84	7.89	12	19	0	0	53	0	0	0	0	2	7	0	0	5	825.5	1429	2254.5	1	1	0	0	1	0	0	0	0	1	1	0	0	1	0	1	1	1
LM-12-195	m	j	2012	513	0.45	10.8	3.53	4.28	7.93		1.73	0.84	0.84	7.89	0	0	25	0	15	15	0	0	0	3	13	0	1	6	595.5	2329	2924.5	0	0	1	0	1	1	0	0	0	1	1	0	1	0	1	1	1	1
LM-12-198	m	j	2012	541.56	1.95	14.79	3.53	4.28	7.93		1.73	0.84	0.84	7.89	0	1	0	0	45	112	0	0	0	7	0	0	2	5	539.5	2184.5	2724	0	1	0	0	1	1	0	0	0	1	0	0	1	1	0	1	1	1
LM-12-199	f	j	2012	493.77	-0.64	9.53	3.53	4.28	7.93		1.73	0.84	0.84	7.89	0	0	0	0	9	0	0	0	0	2	1	0	1	4	0	1436.5	1436.5	0	0	0	0	1	0	0	0	0	1	1	0	1	0	0	1	1	0
LM-12-200	f	j	2012	486.54	-0.48	-0.27	3.53	4.28	7.93		1.73	0.84	0.84	7.89	0	0	0	0	9	0	0	0	0	0	3	0	2	3	0	1399	1399	0	0	0	0	1	0	0	0	0	0	1	0	1	0	0	1	1	0
LM-12-221	f	j	2012	474.64	-0.76	-7.61	3.53	4.28	7.93		1.73	0.84	0.84	7.89	153	0	0	0	94	84	0	0	0	5	2	0	0	5	489	2040	2529	1	0	0	0	1	1	0	0	0	1	1	0	0	1	0	1	1	1
LM-12-222	f	j	2012	503.6	-0.5	17.12	3.53	4.28	7.93		1.73	0.84	0.84	7.89	0	0	8	0	12	0	0	0	0	0	2	0	0	4	1186.5	855	2041.5	0	0	1	0	1	0	0	0	0	0	1	0	0	0	1	1	1	1
LM-12-401	m	j	2012	514.8	0.46	12.55	3.53	4.28	7.93		1.73	0.84	0.84	7.89	17	0	3	0	87	3	0	0	0	3	3	0	1	7	795.5	2319	3114.5	1	0	1	0	1	1	0	0	0	1	1	0	1	1	1	1	1	1
LM-12-410	f	j	2012	435	-2.09	-25.52	3.53	4.28	7.93		1.73	0.84	0.84	7.89	152	0	0	0	52	37	0	0	0	2	5	0	0	5	487.5	1966.5	2454	1	0	0	0	1	1	0	0	0	1	1	0	0	1	0	1	1	1
[truncated: 20 more columns]
